# Supplementary material for: Strain-induced bandgap engineering in 2D ψ-graphene materials: a first-principles study
Source: PubMed Central journal article supplement (PMC11590022; doi:10.3762/bjnano.15.116), 2024-11-20
Supplement: Beilstein_J_Nanotechnol-15-1440-s001.pdf [file Beilstein_J_Nanotechnol-15-1440-s001.pdf]

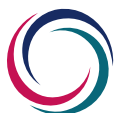

## Supporting Information

for

### **Strain-induced bandgap engineering in 2D $\psi$ -graphene materials: a first-principles study**

Kamal Kumar, Nora H. de Leeuw, Jost Adam and Abhishek Kumar Mishra

*Beilstein J. Nanotechnol.* **2024**, *15*, 1440–1452. [doi:10.3762/bjnano.15.116](https://doi.org/10.3762/bjnano.15.116)

## Additional figures

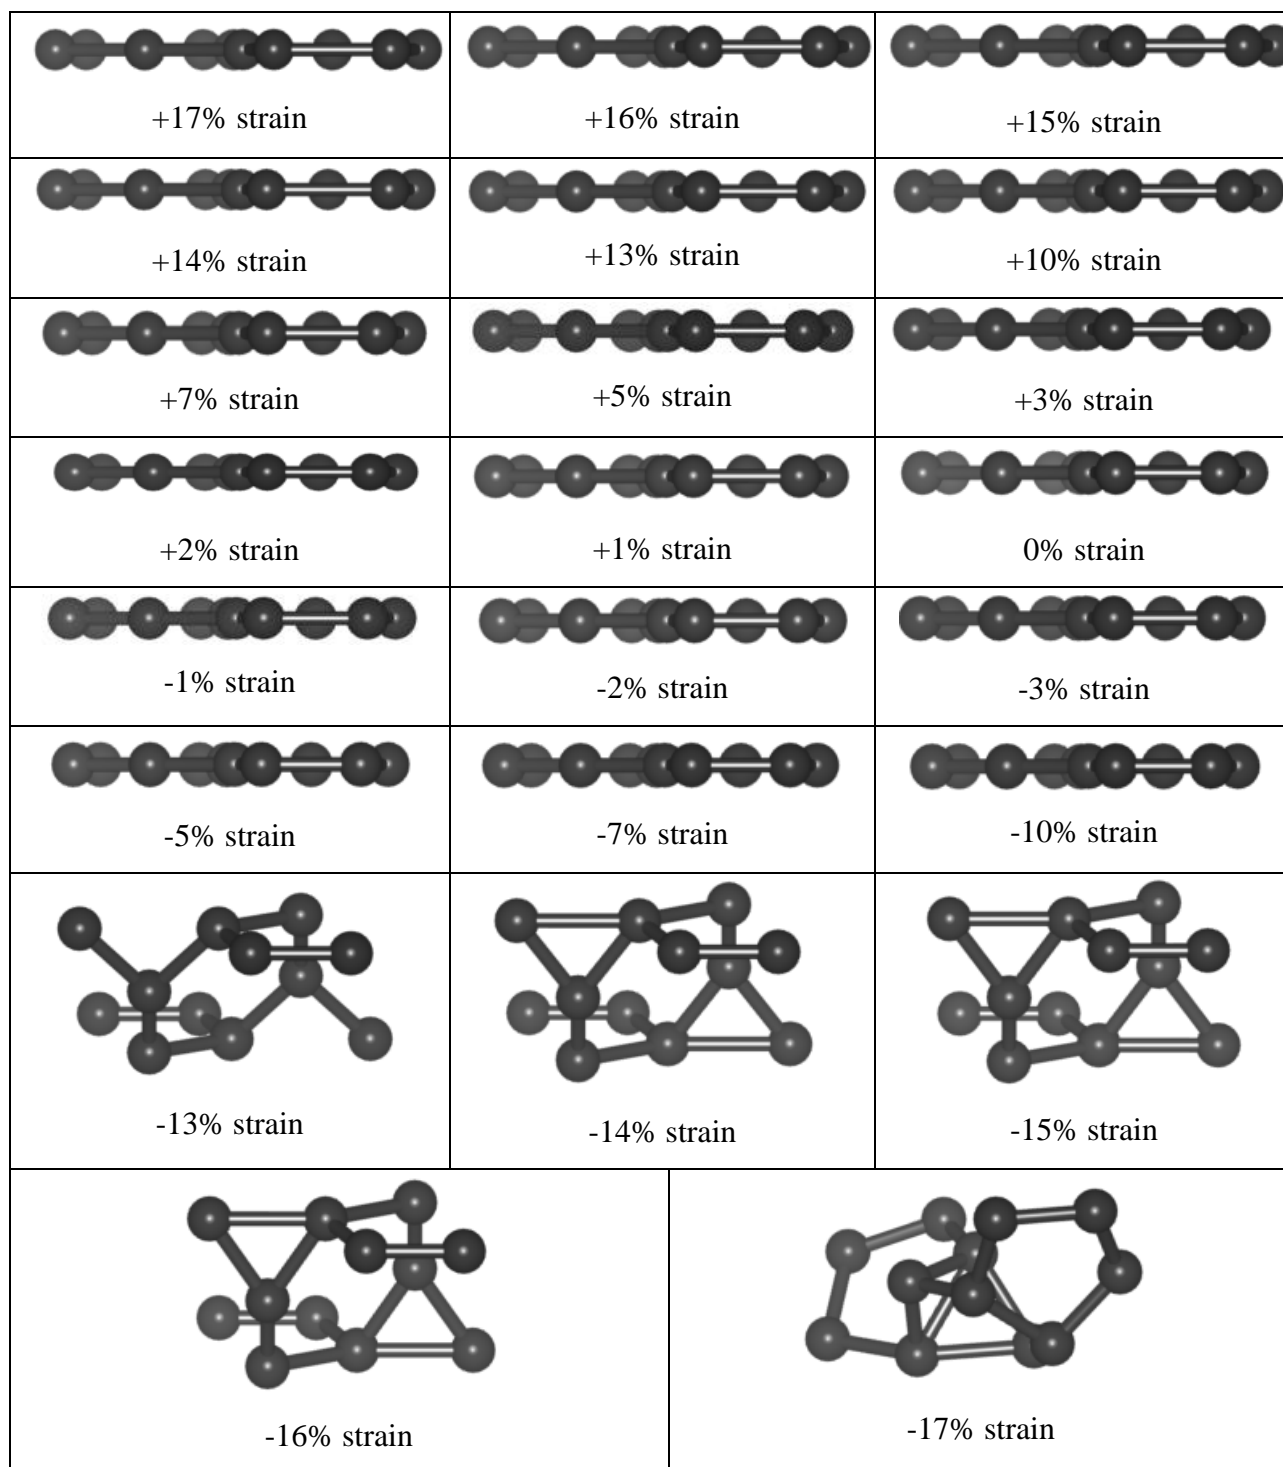

**Figure S1:** Side view of the relaxed unit cell of  $\psi$ -graphene at different strain values.

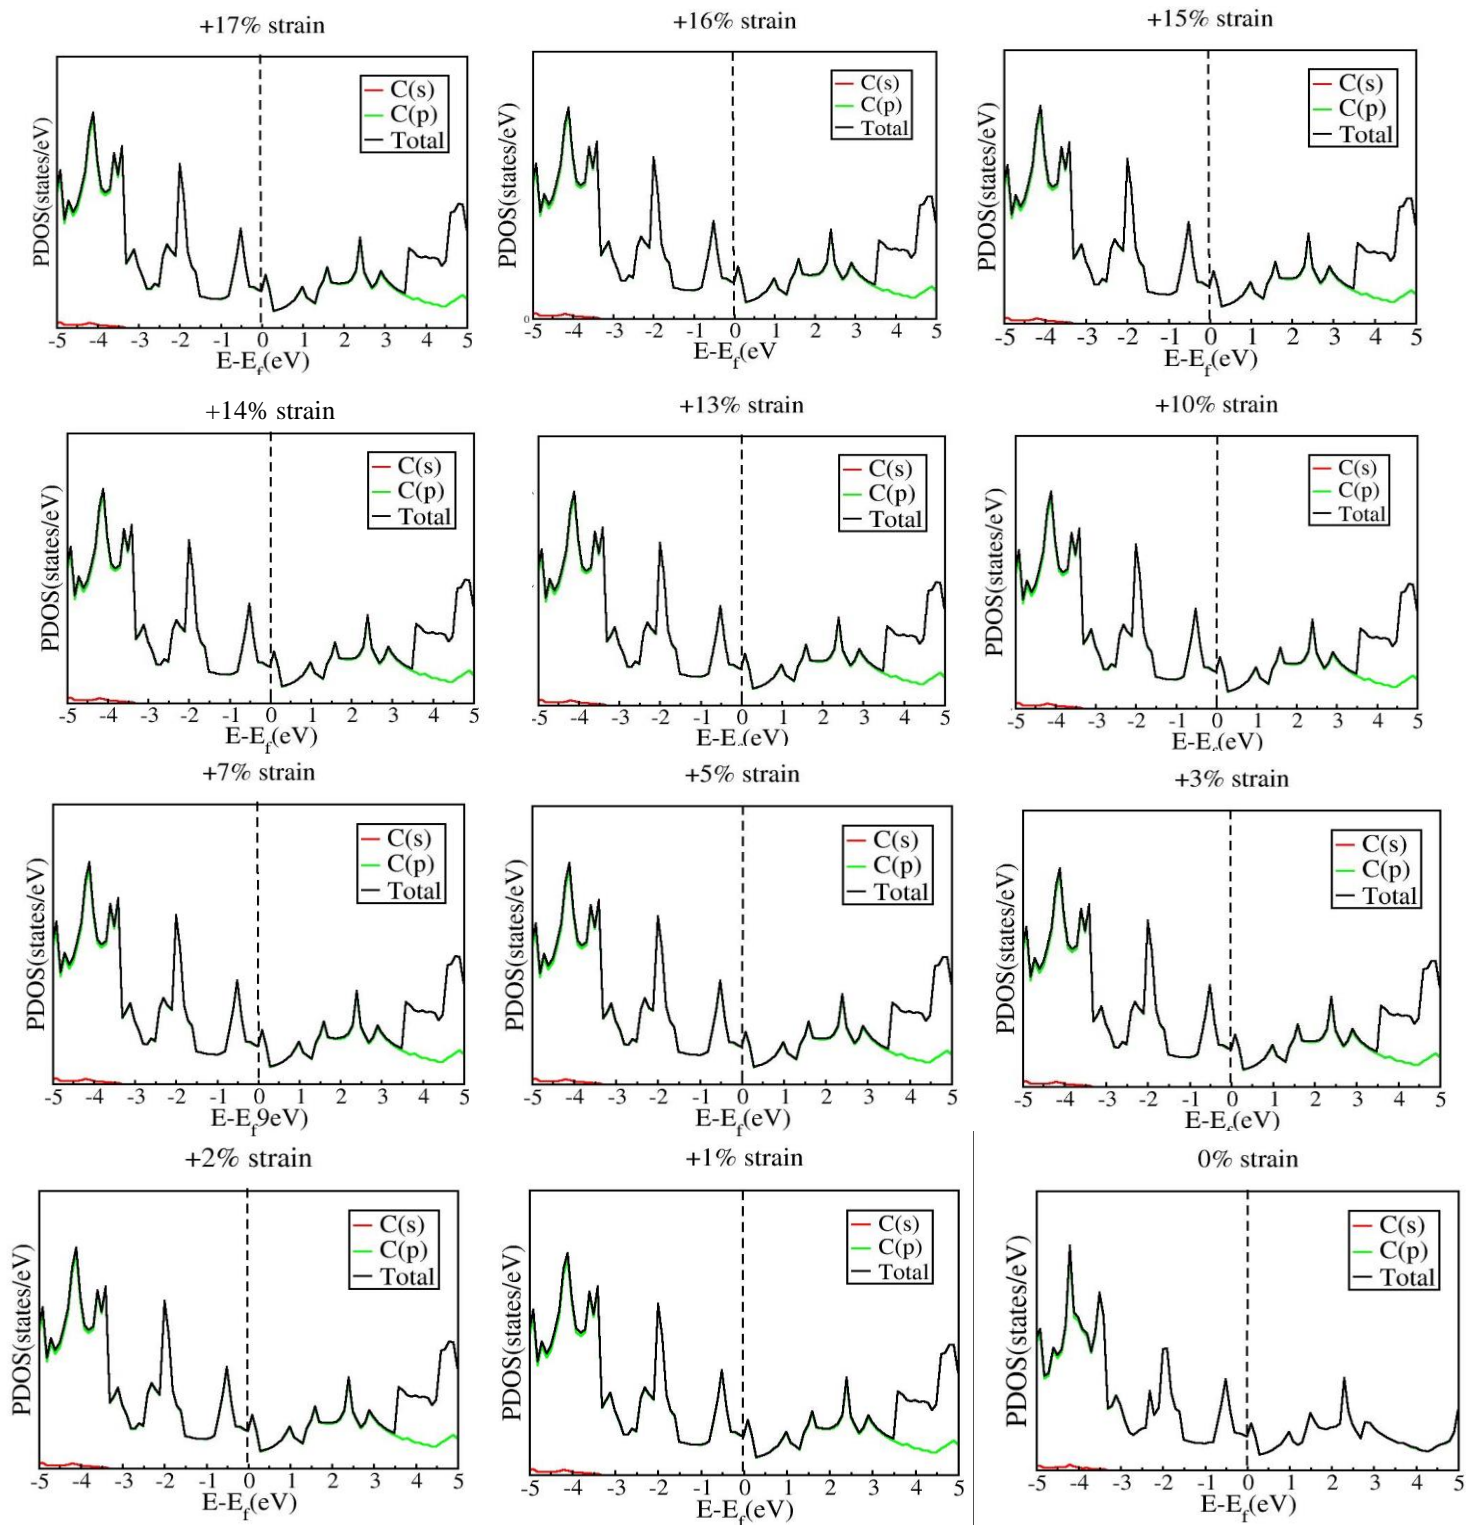

**Figure S2:** PDOS of  $\psi$ -graphene at different values of positive strain.

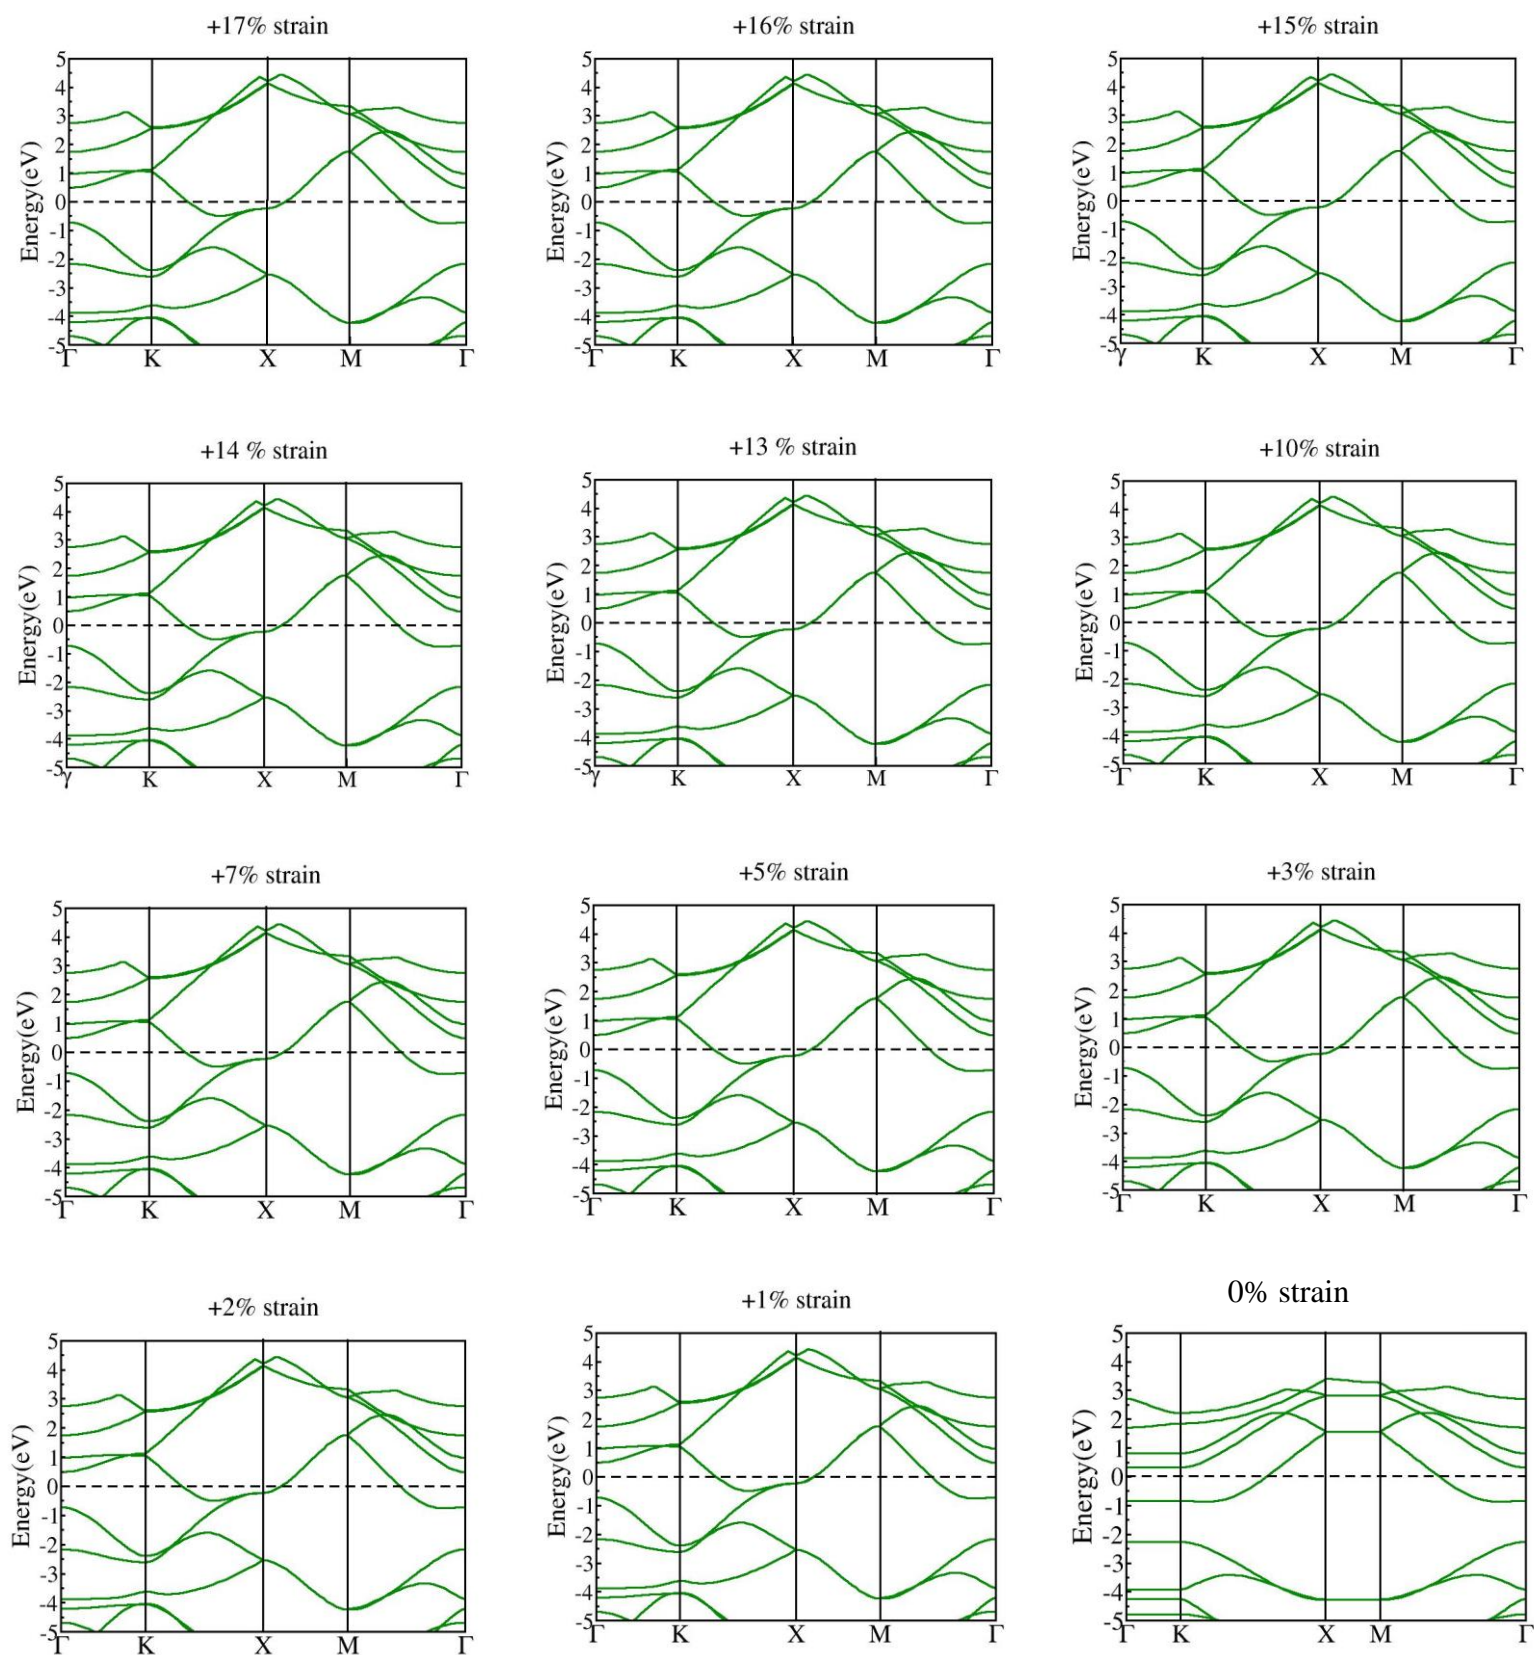

**Figure S3:** Electronic band structure of  $\psi$ -graphene at different values of positive strain.



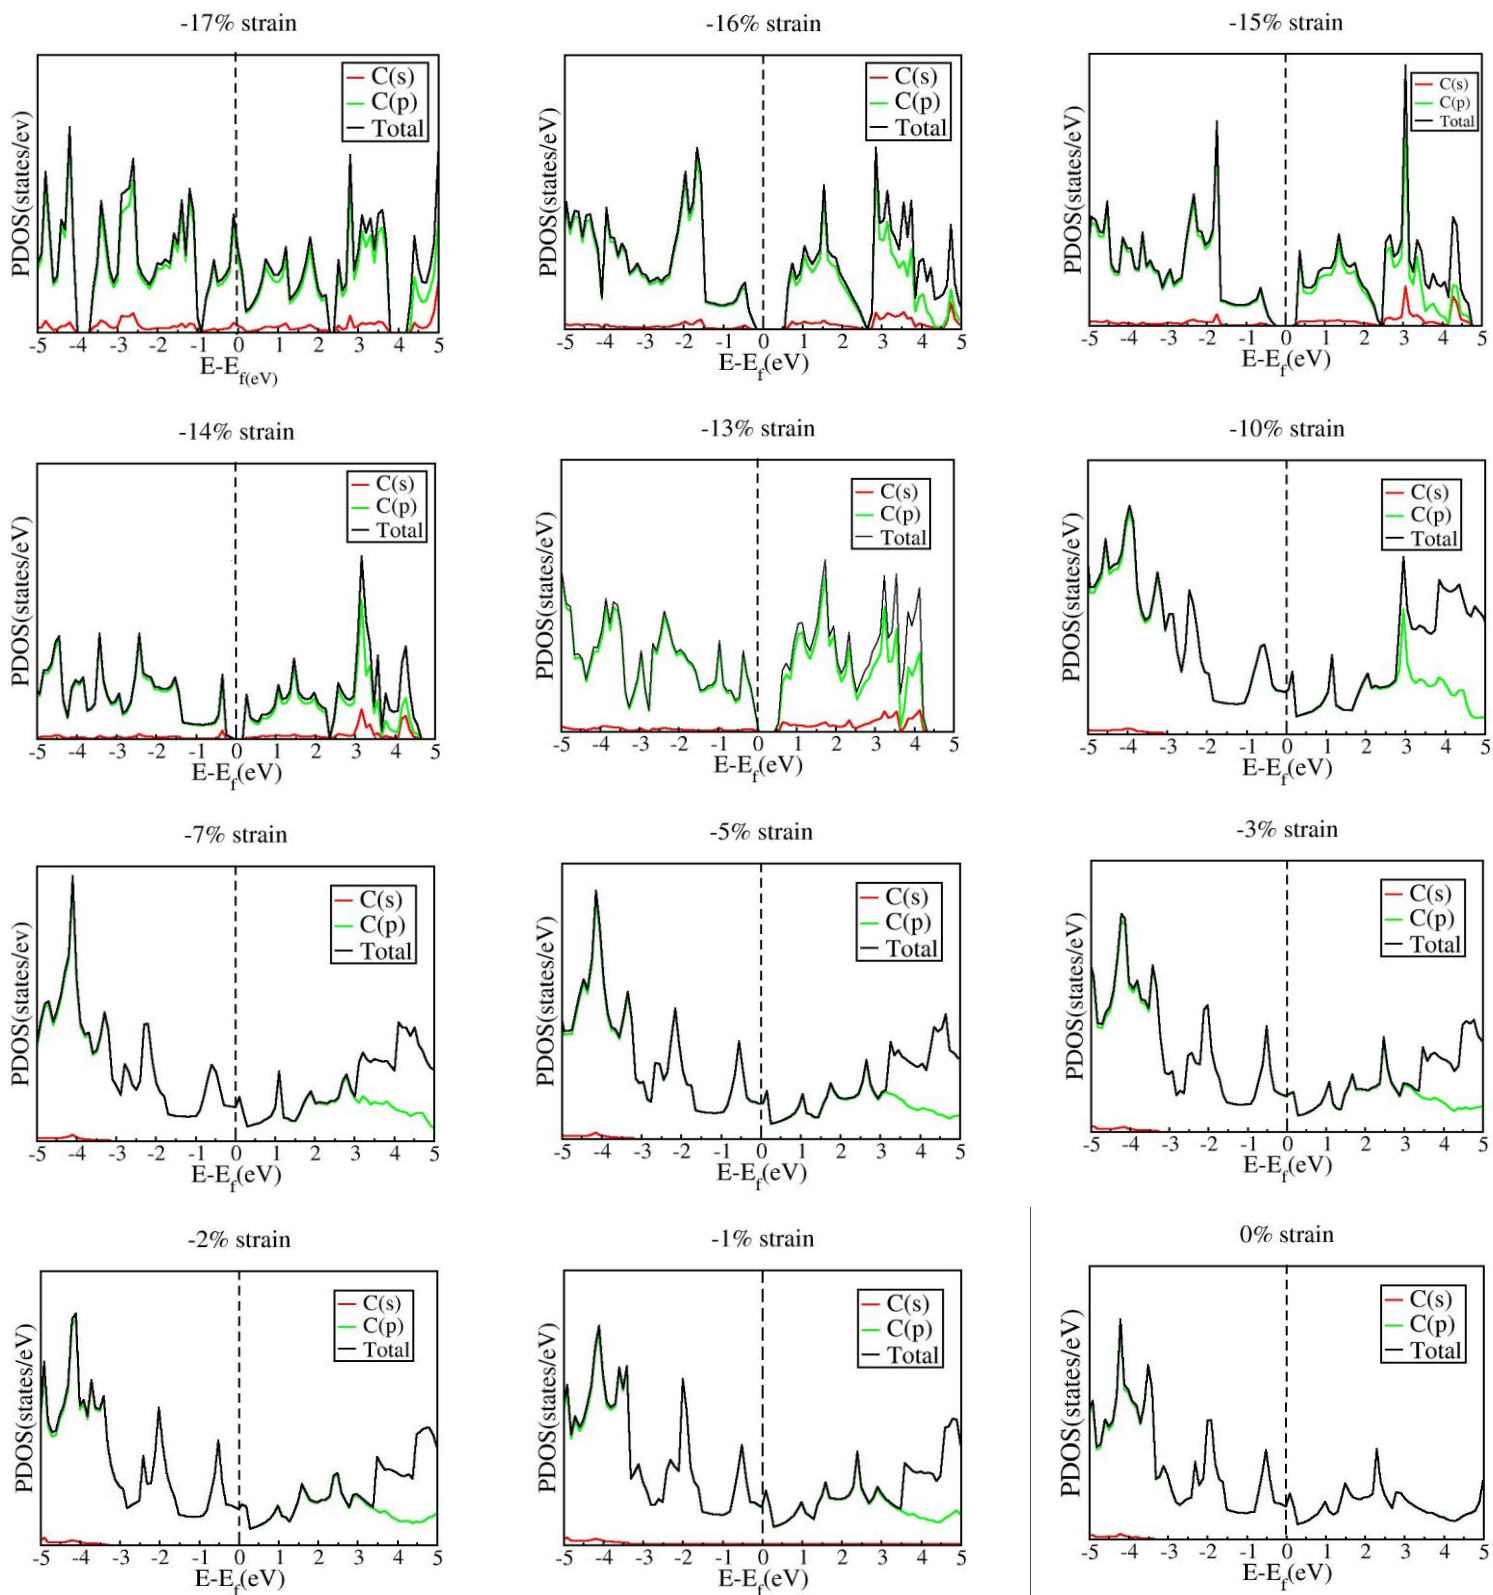

**Figure S4:** PDOS of  $\psi$ -graphene at different values of negative strain.

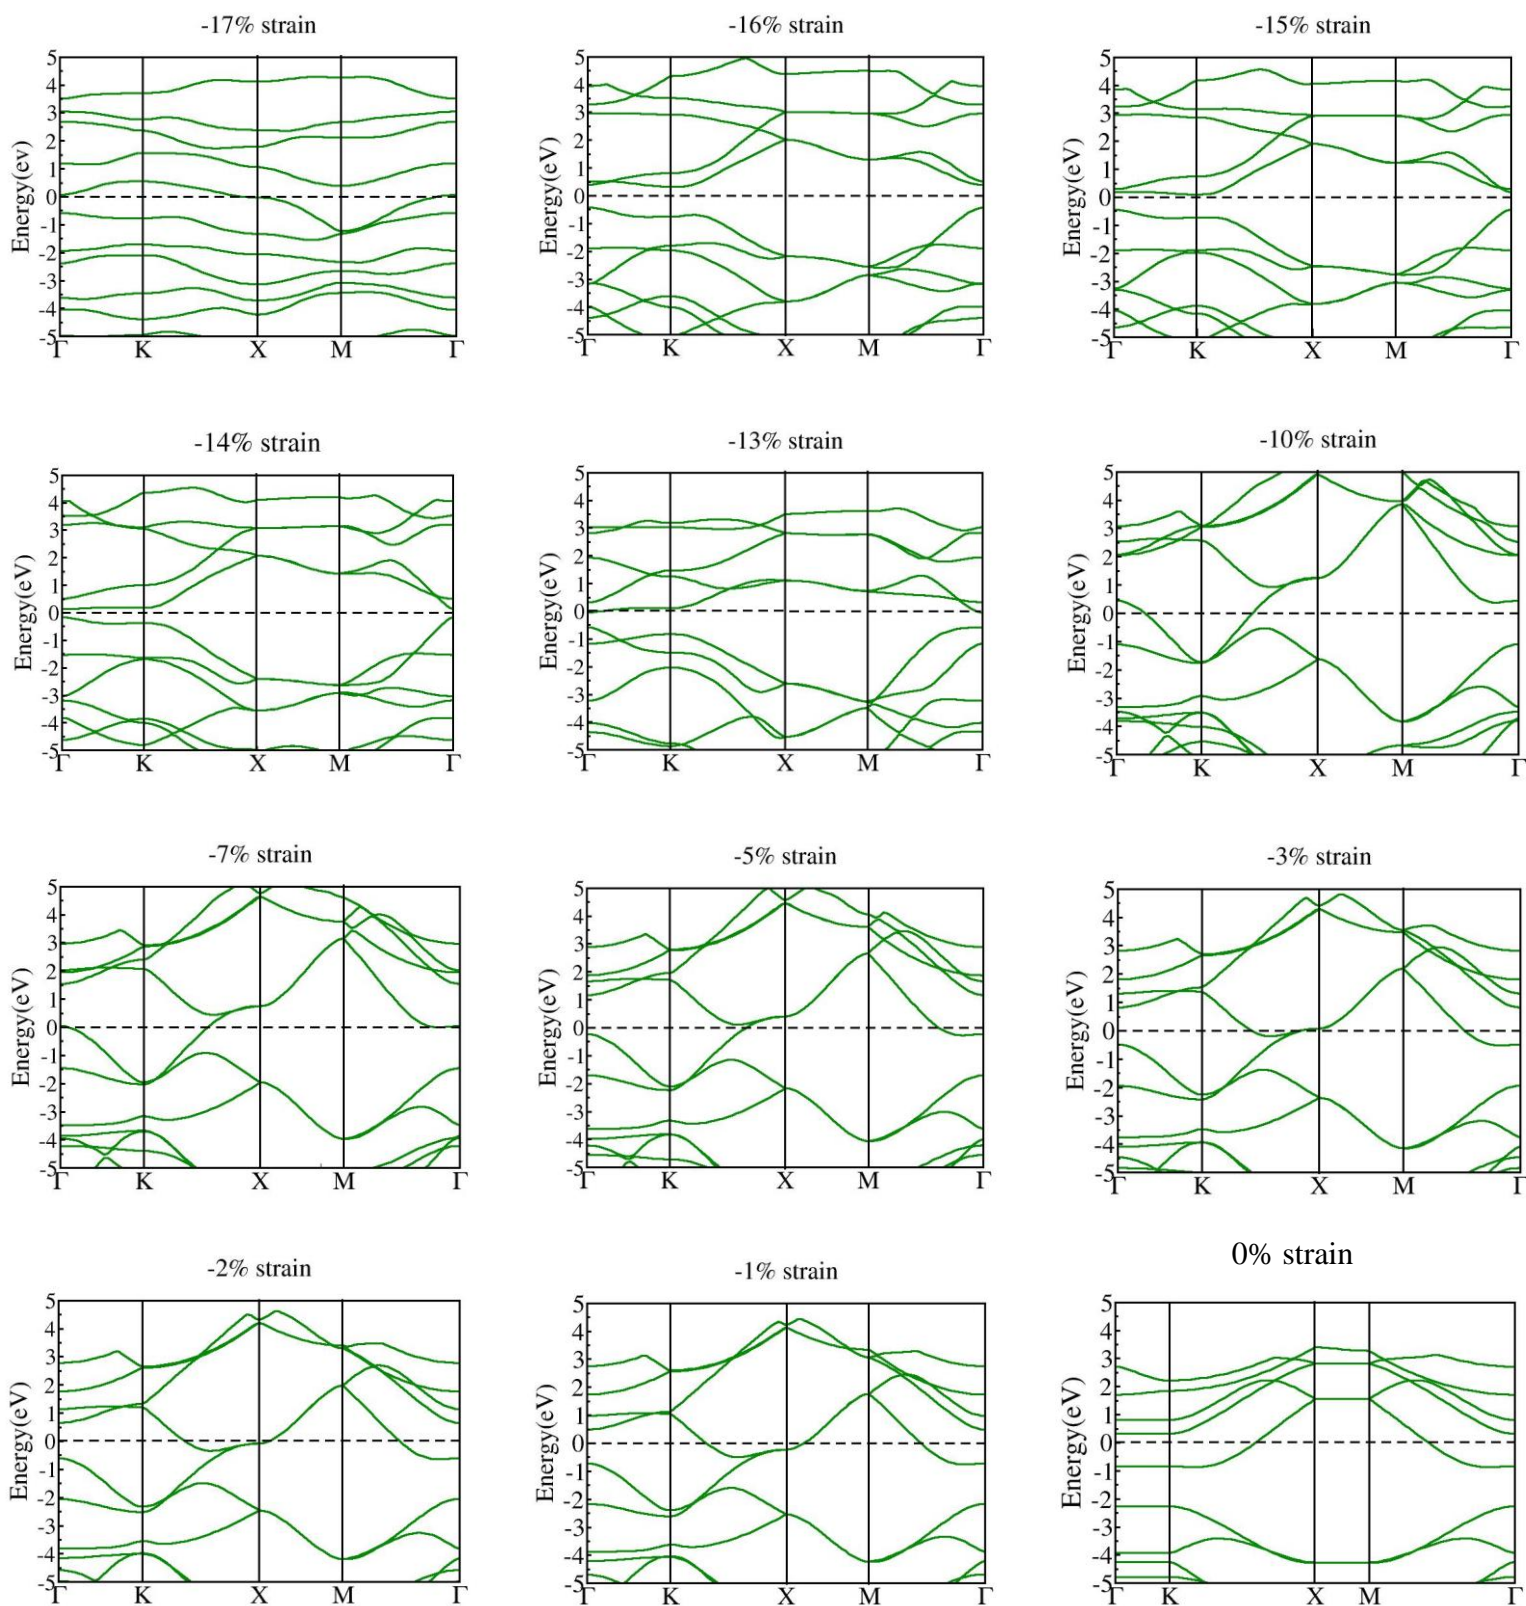

**Figure S5:** Electronic band structure of  $\psi$ -graphene at different values of negative strain.

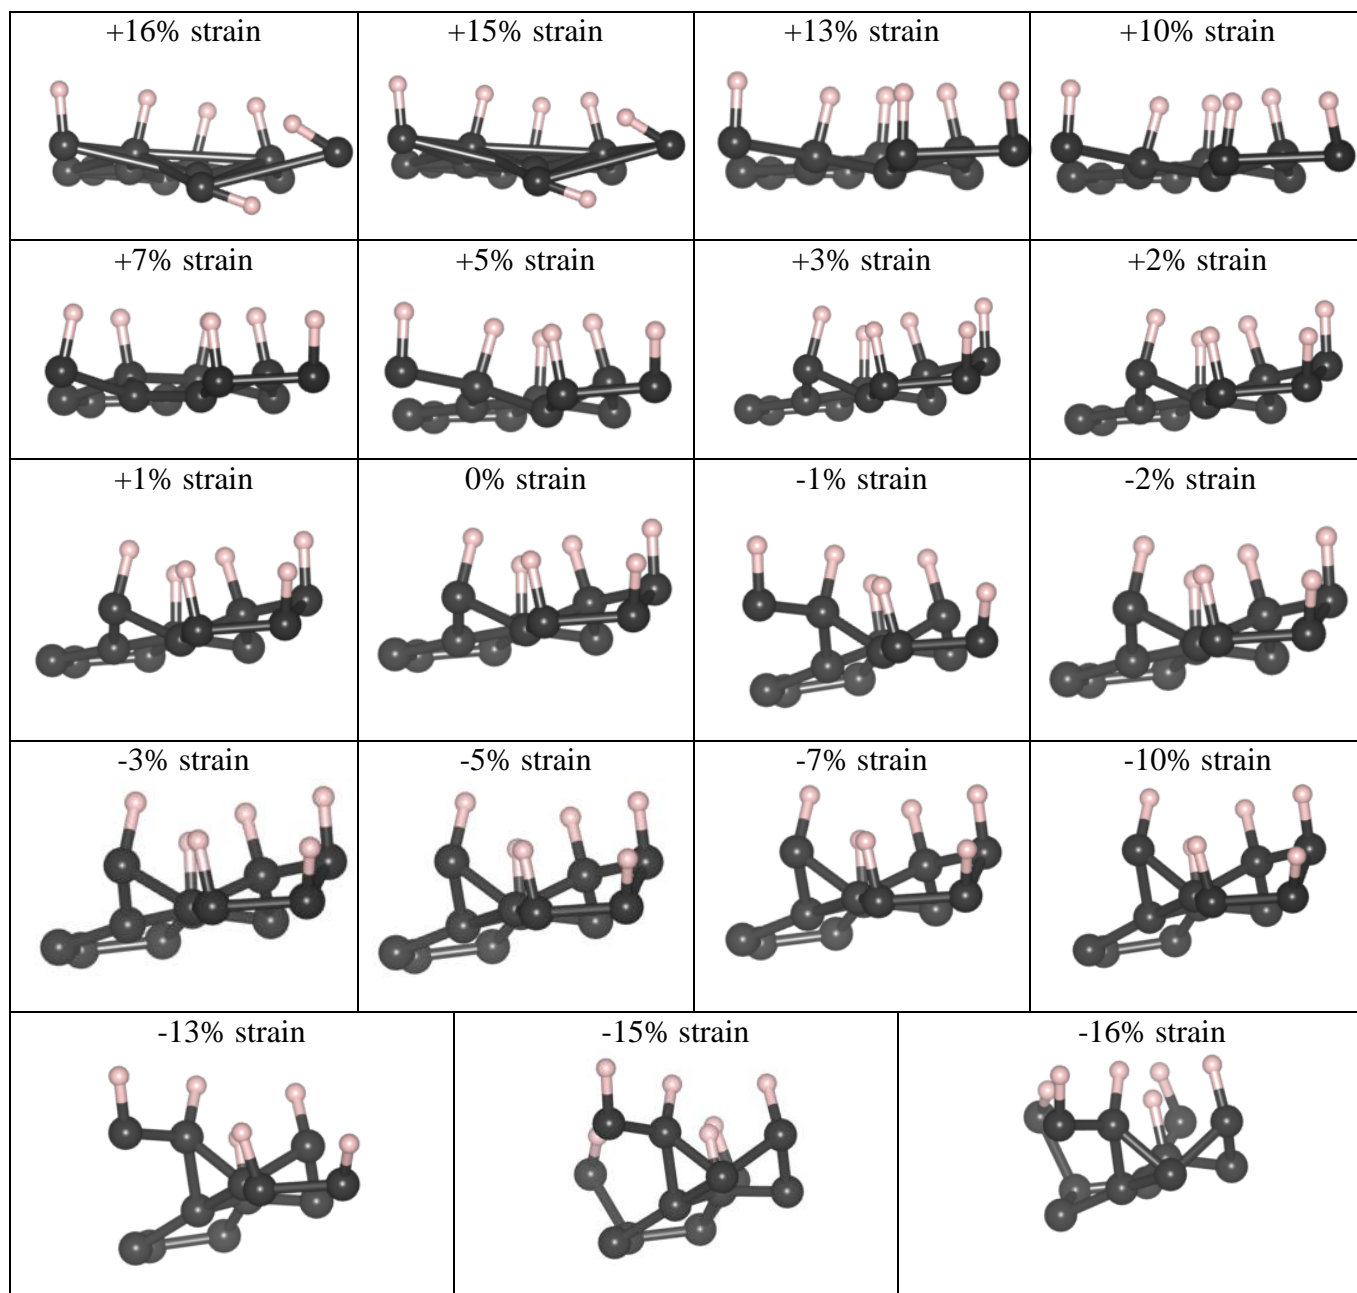

**Figure S6:** Side view of the relaxed unit cell of  $\psi$ -graphene at different strain values.



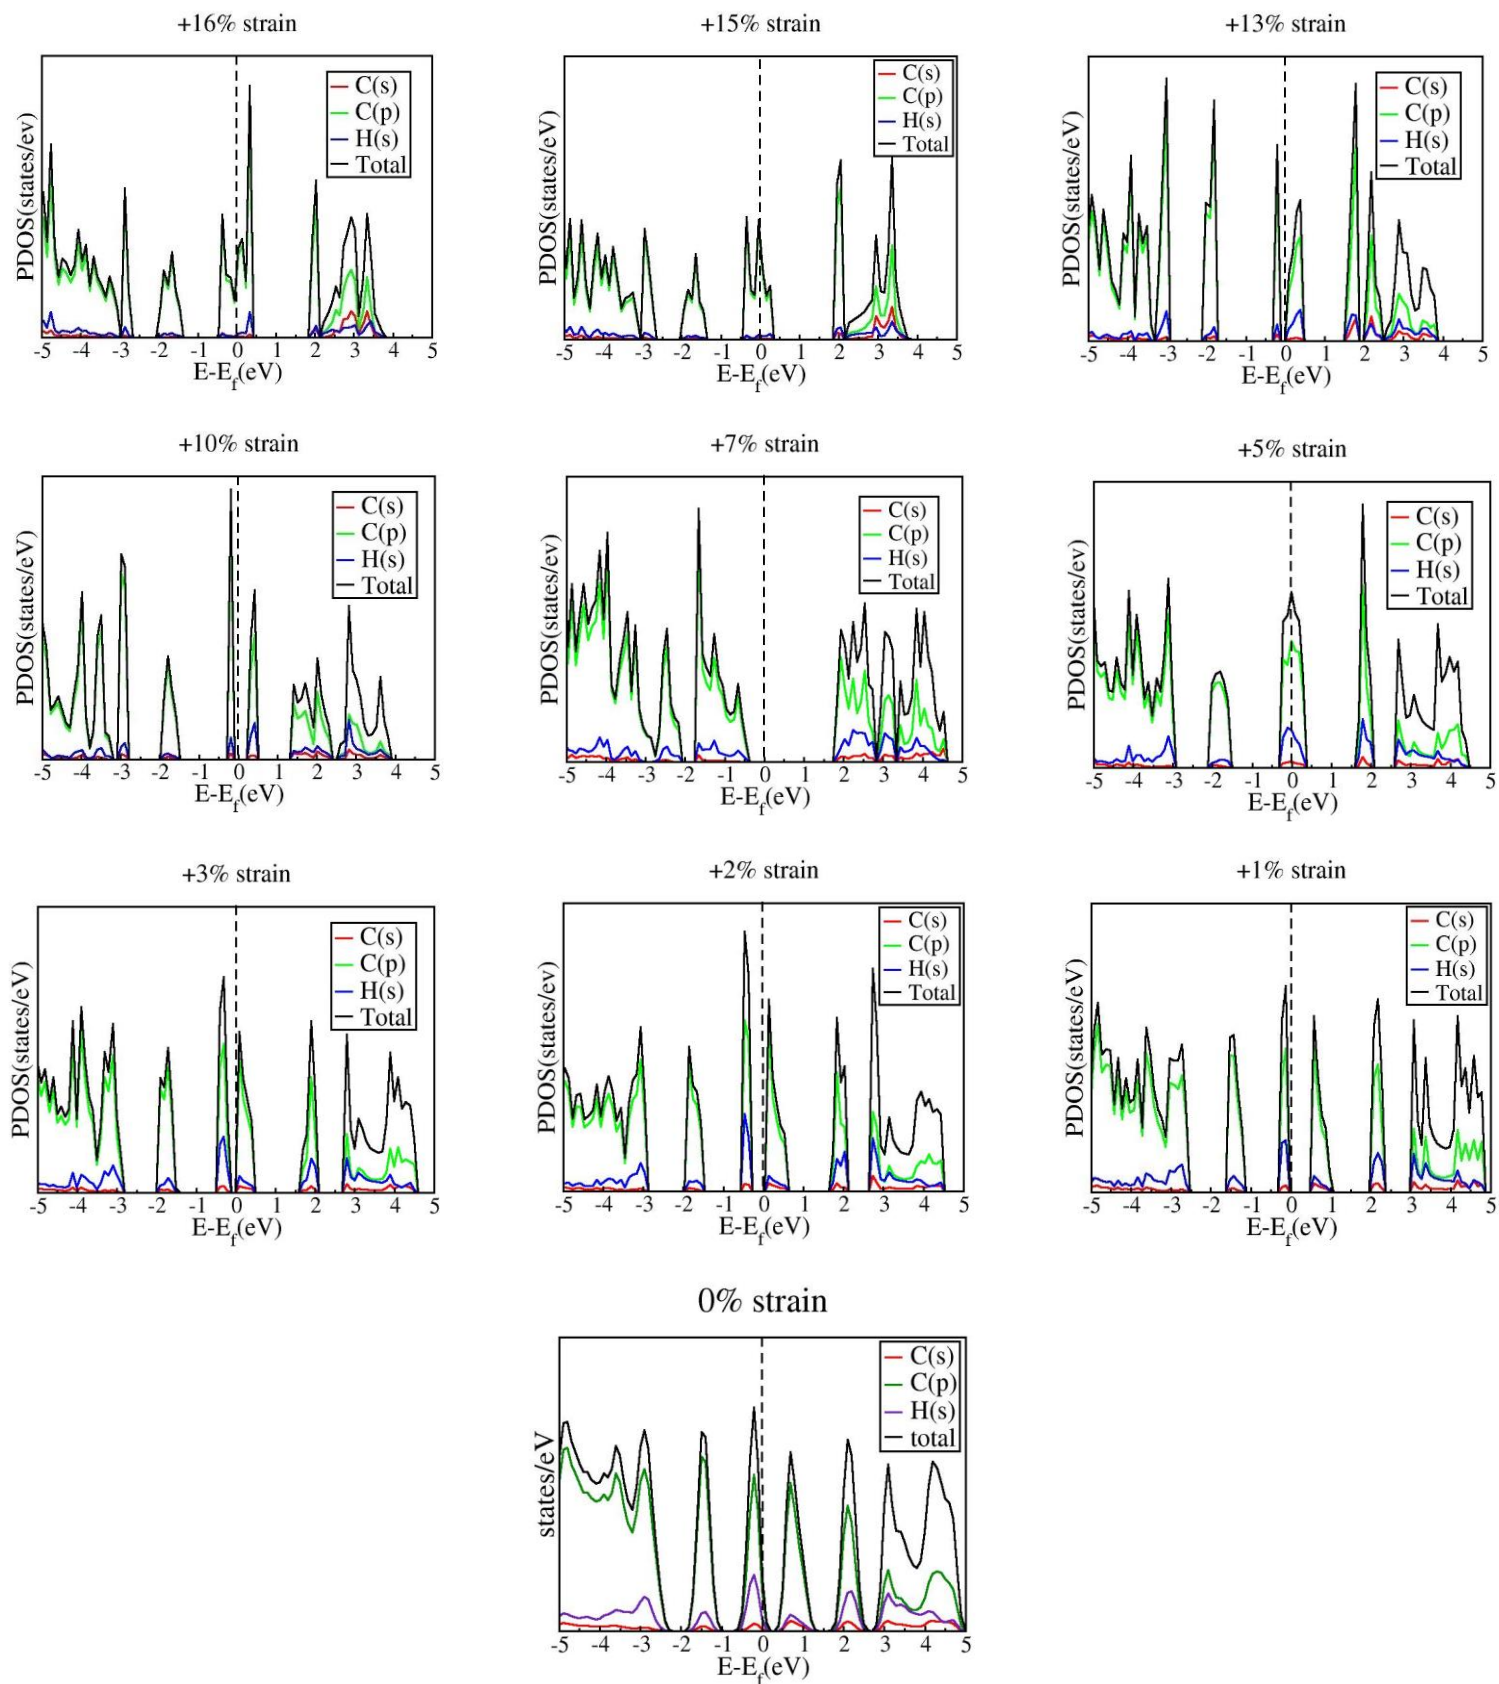

**Figure S7:** PDOS of  $\psi$ -graphene at different values of positive strain.



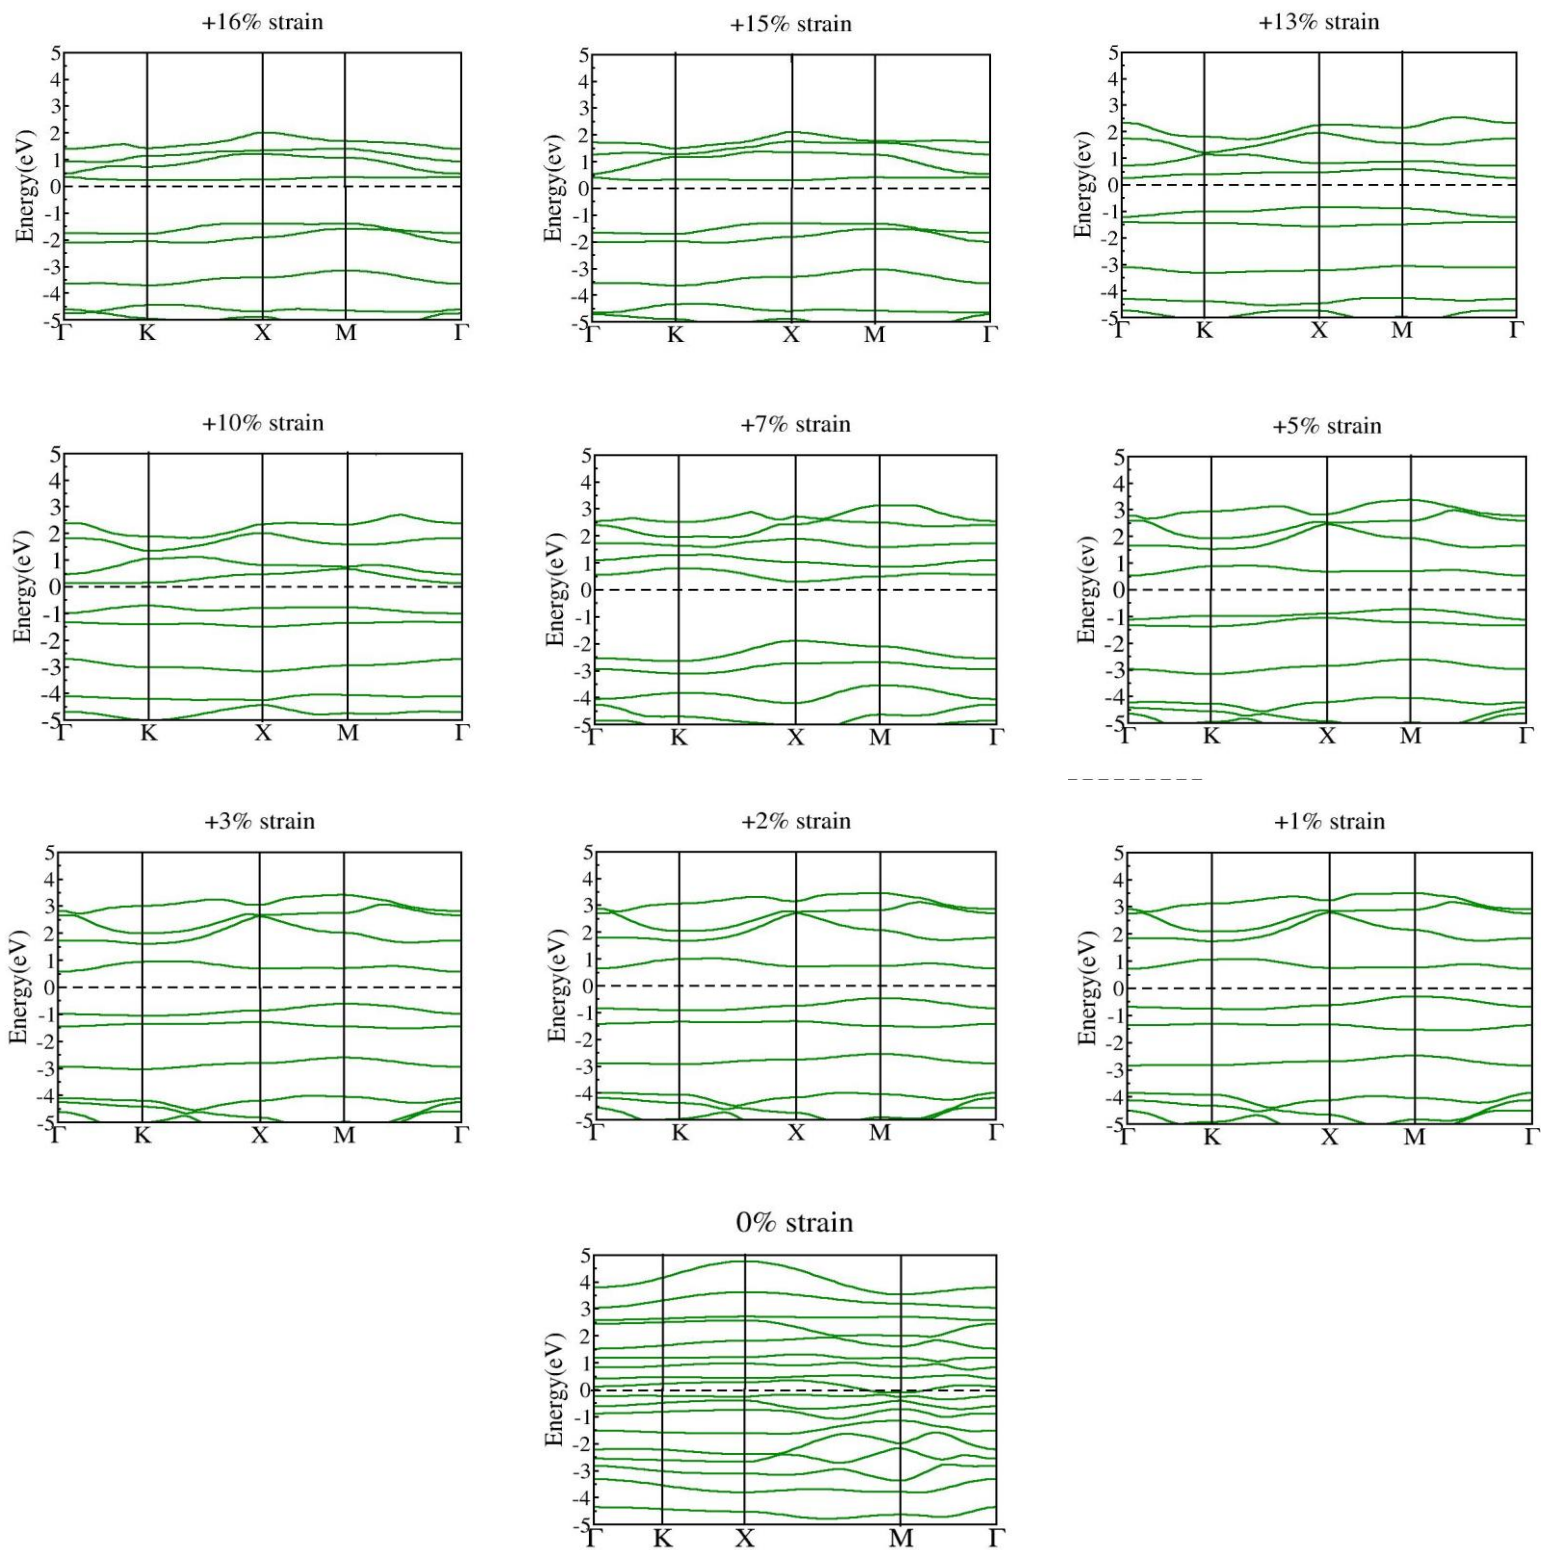

**Figure S8:** Electronic band structure of  $\psi$ -graphene at different values of positive strain.

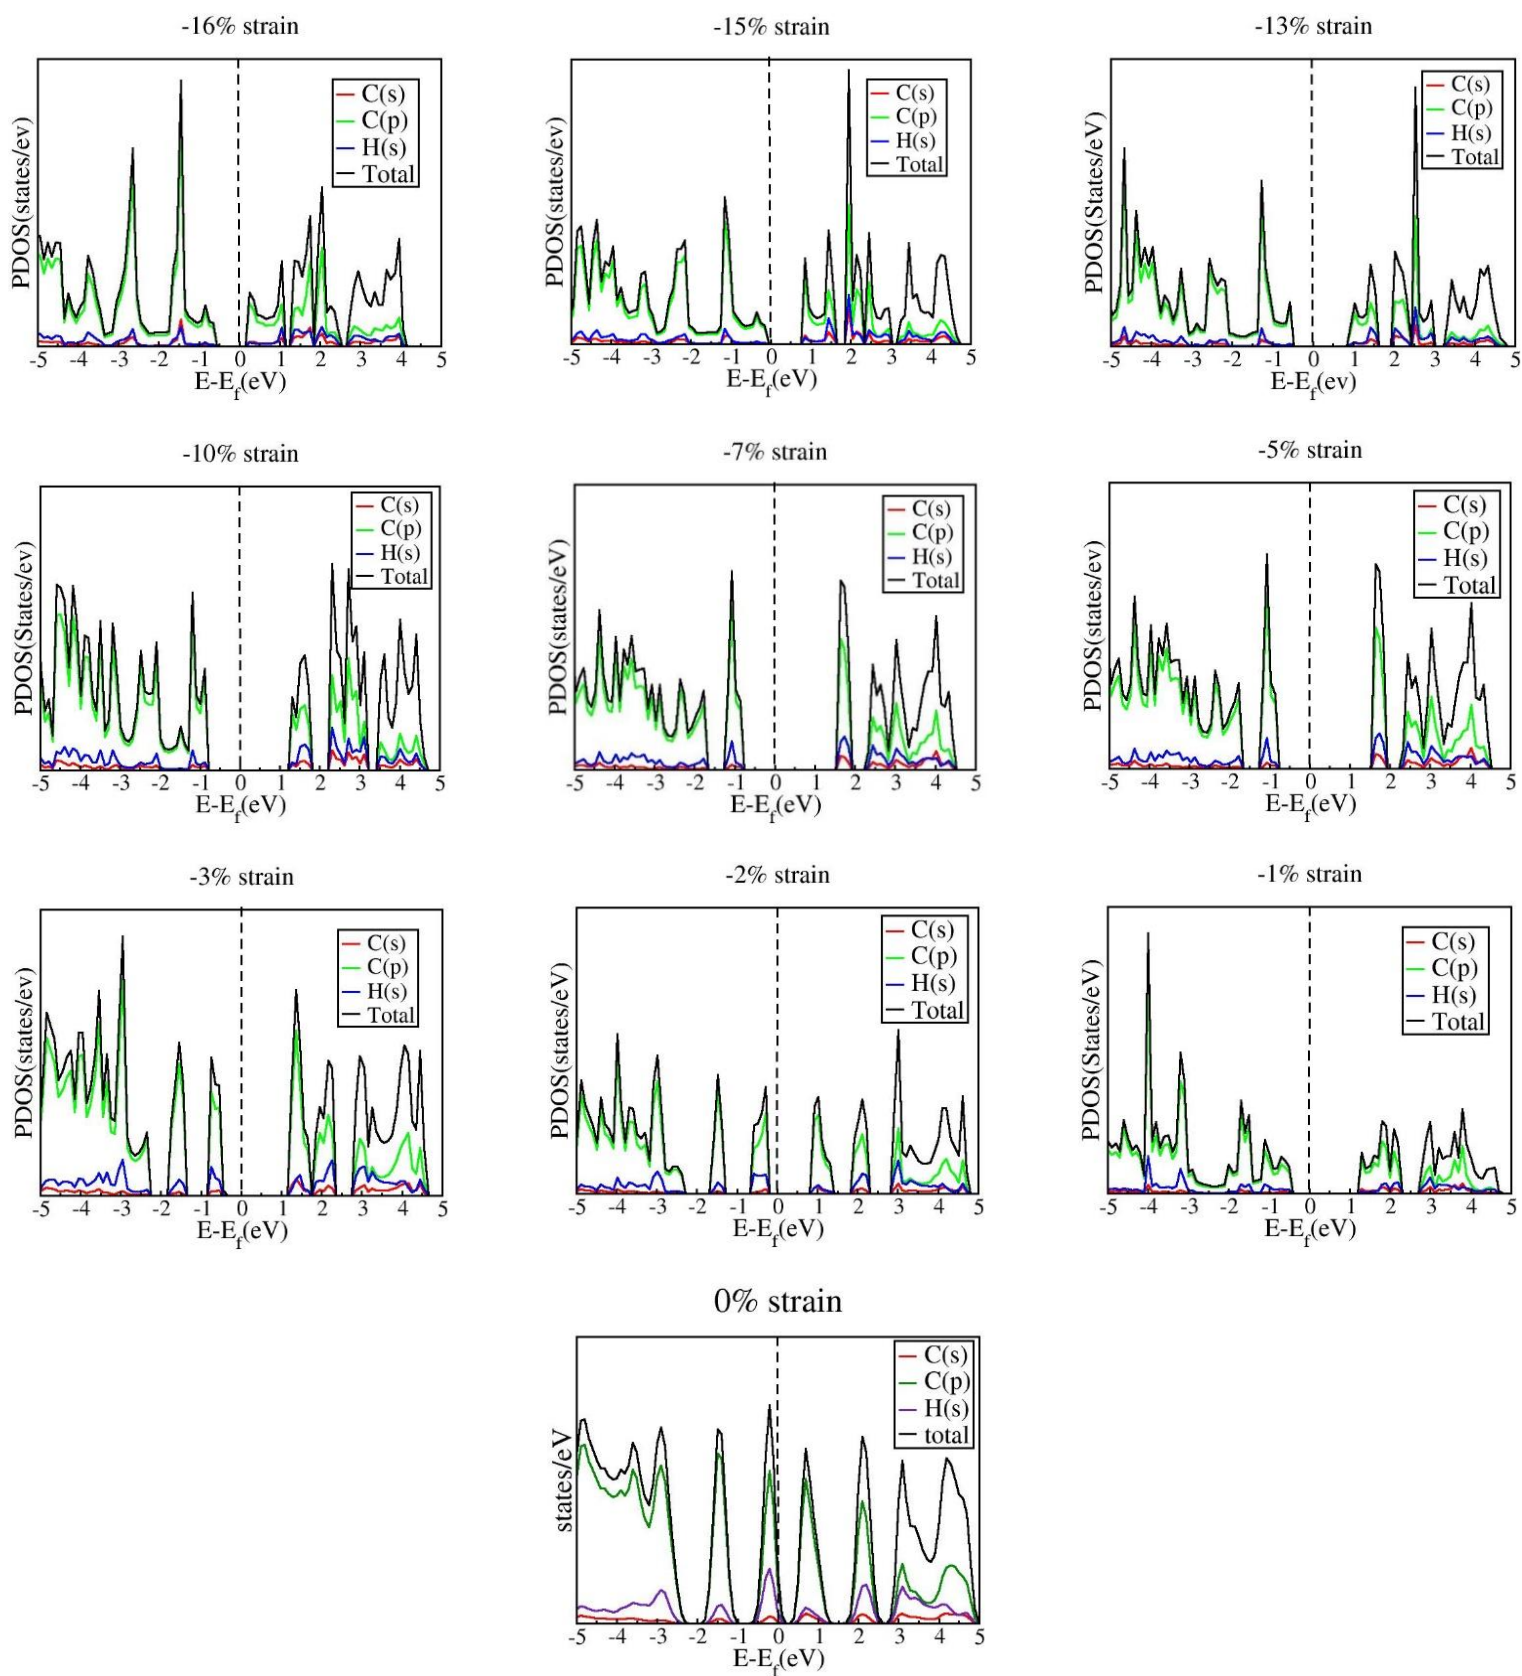

**Figure S9:** PDOS of  $\psi$ -graphene at different values of negative strain.

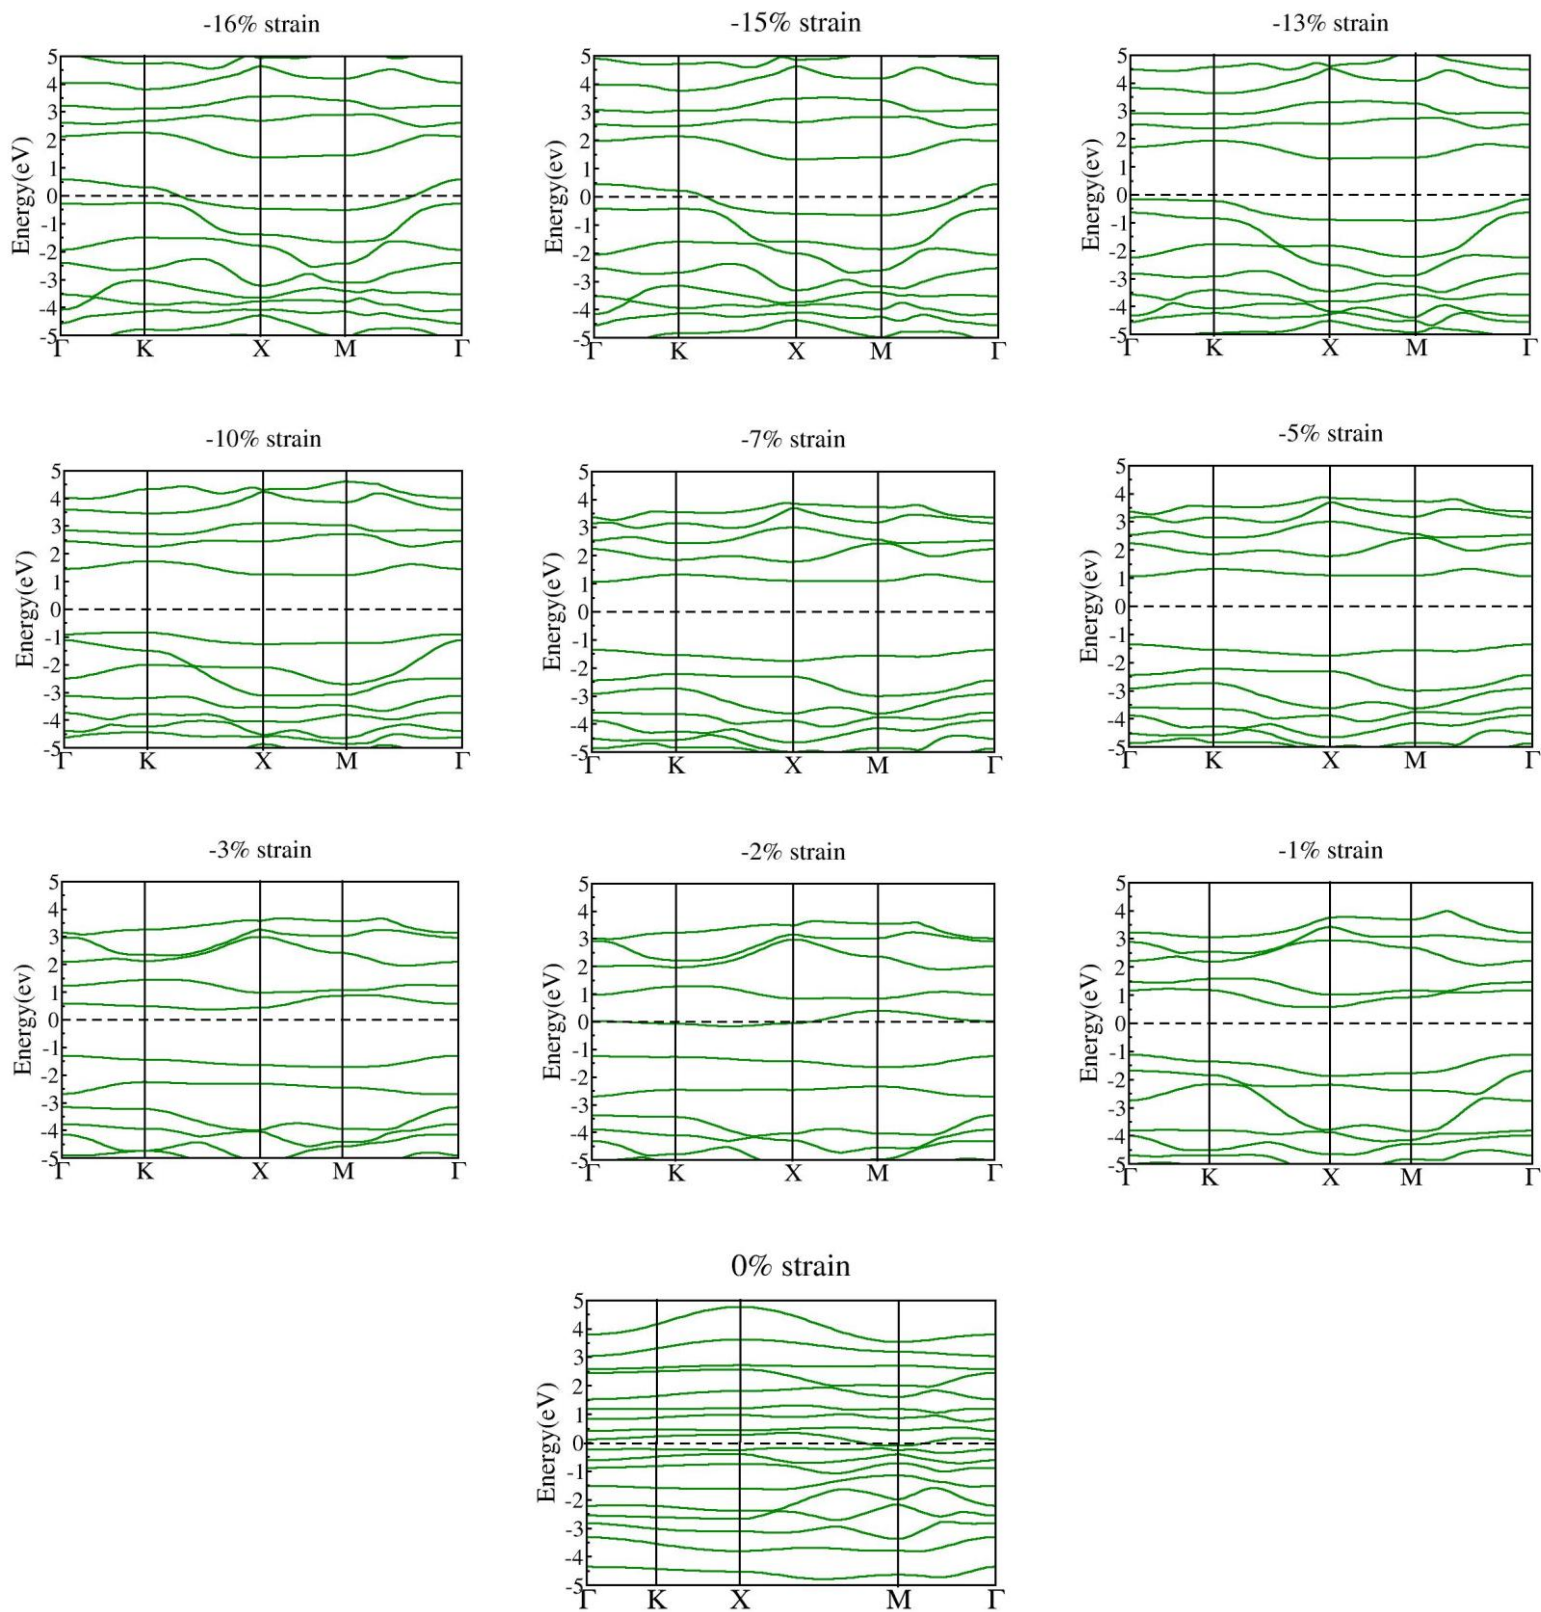

**Figure S10:** Electronic band structure of  $\psi$ -graphene at different values of negative strain.



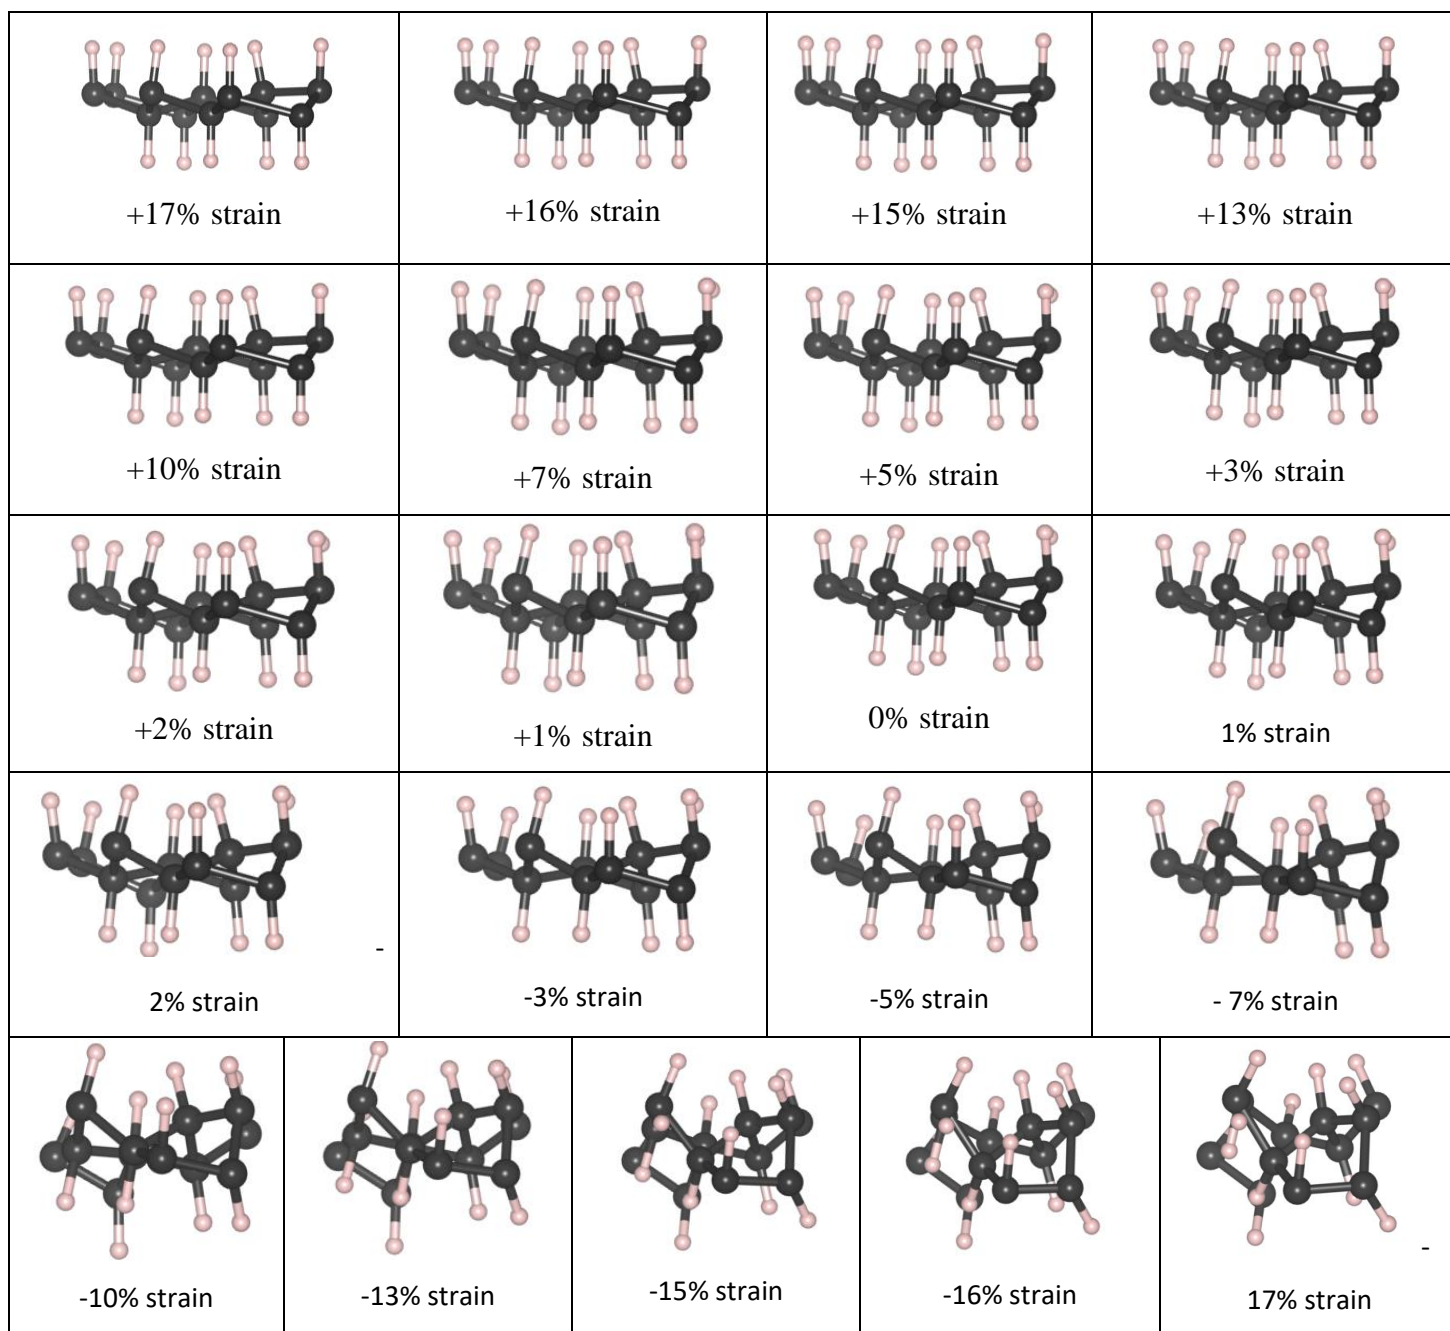

**Figure 11:** Side view of the relaxed unit cell of  $\psi$ -graphane at different strain levels.



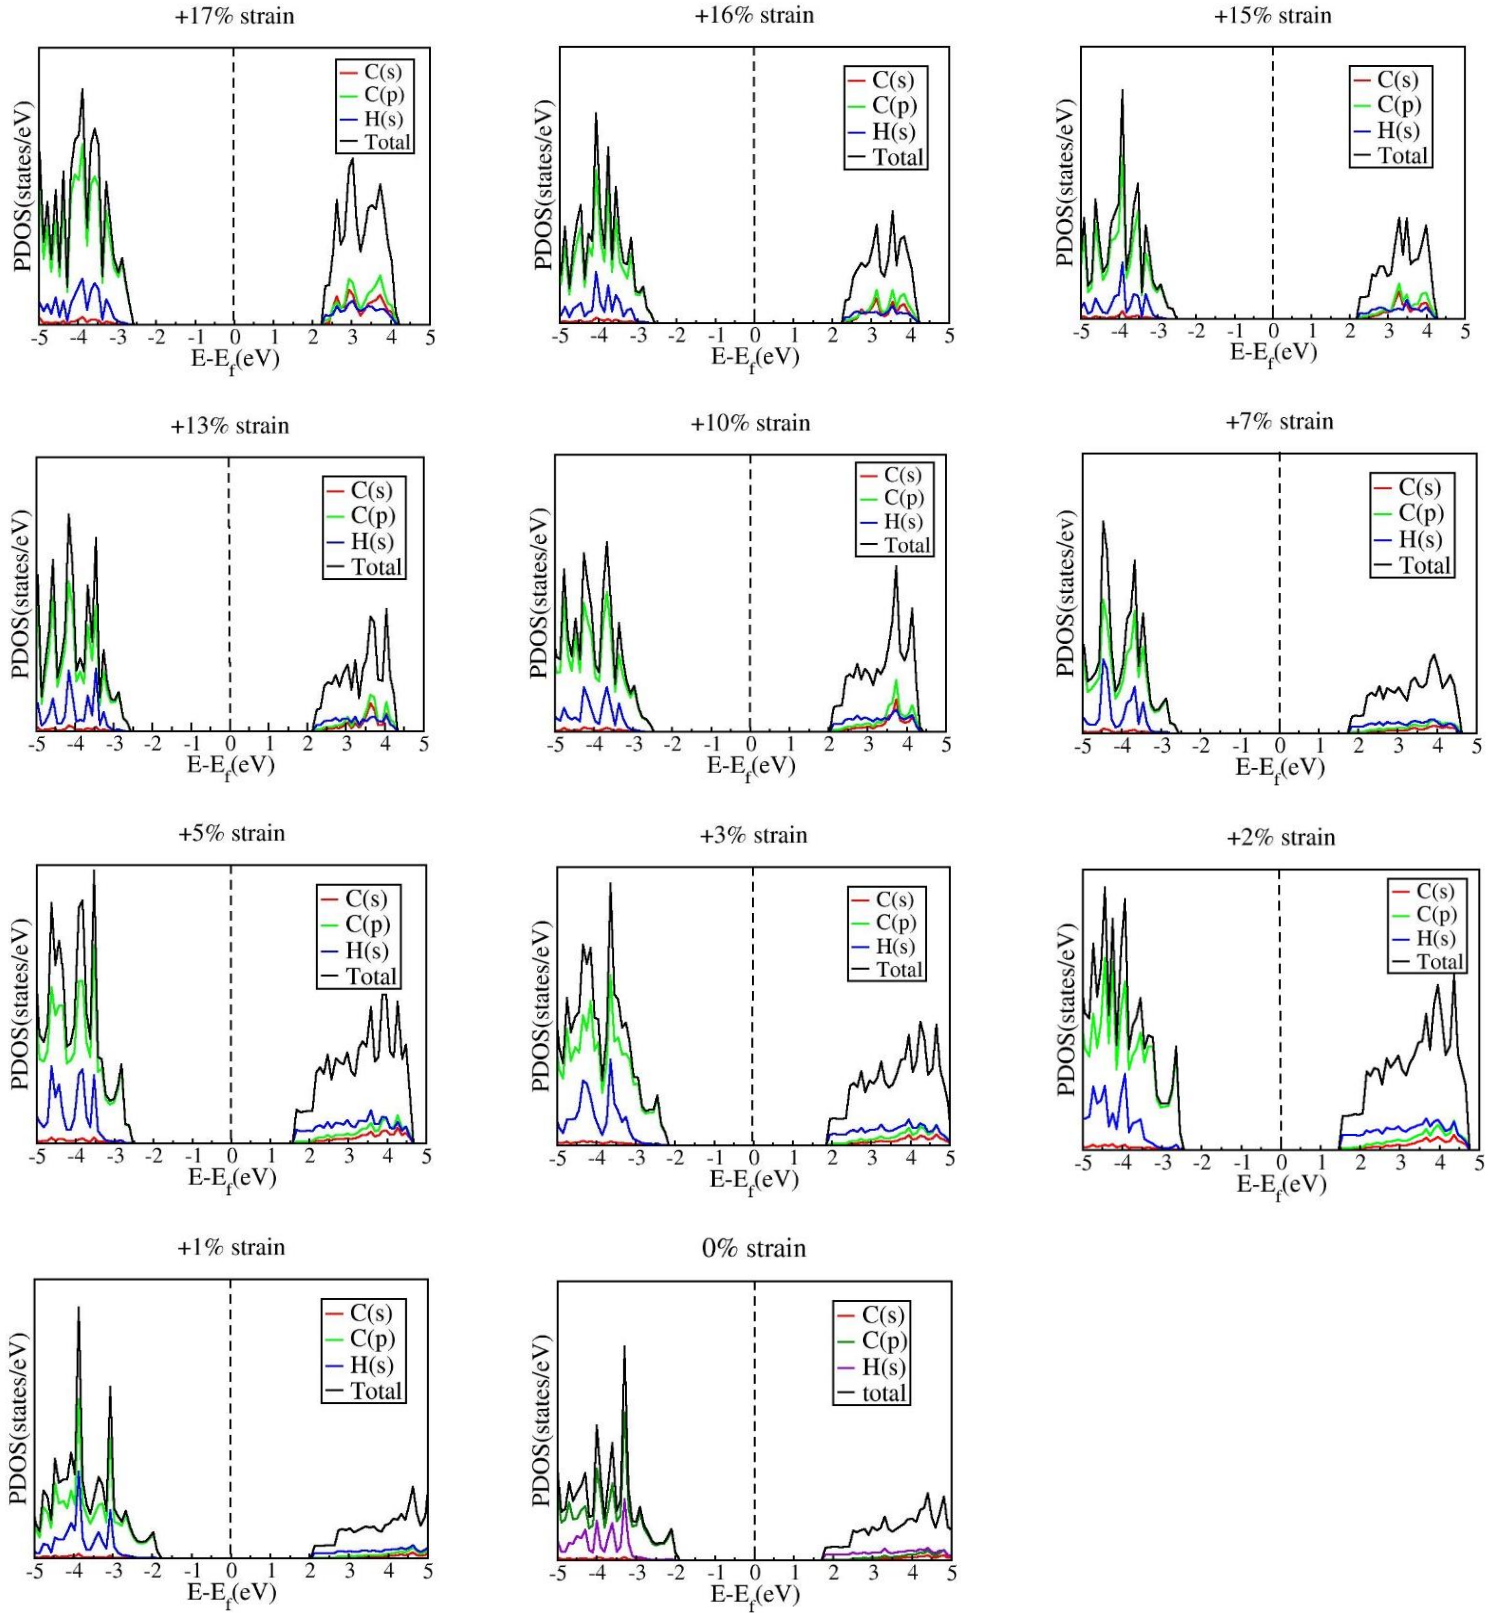

**Figure S12:** PDOS of  $\psi$ -graphane at different values of positive strain.

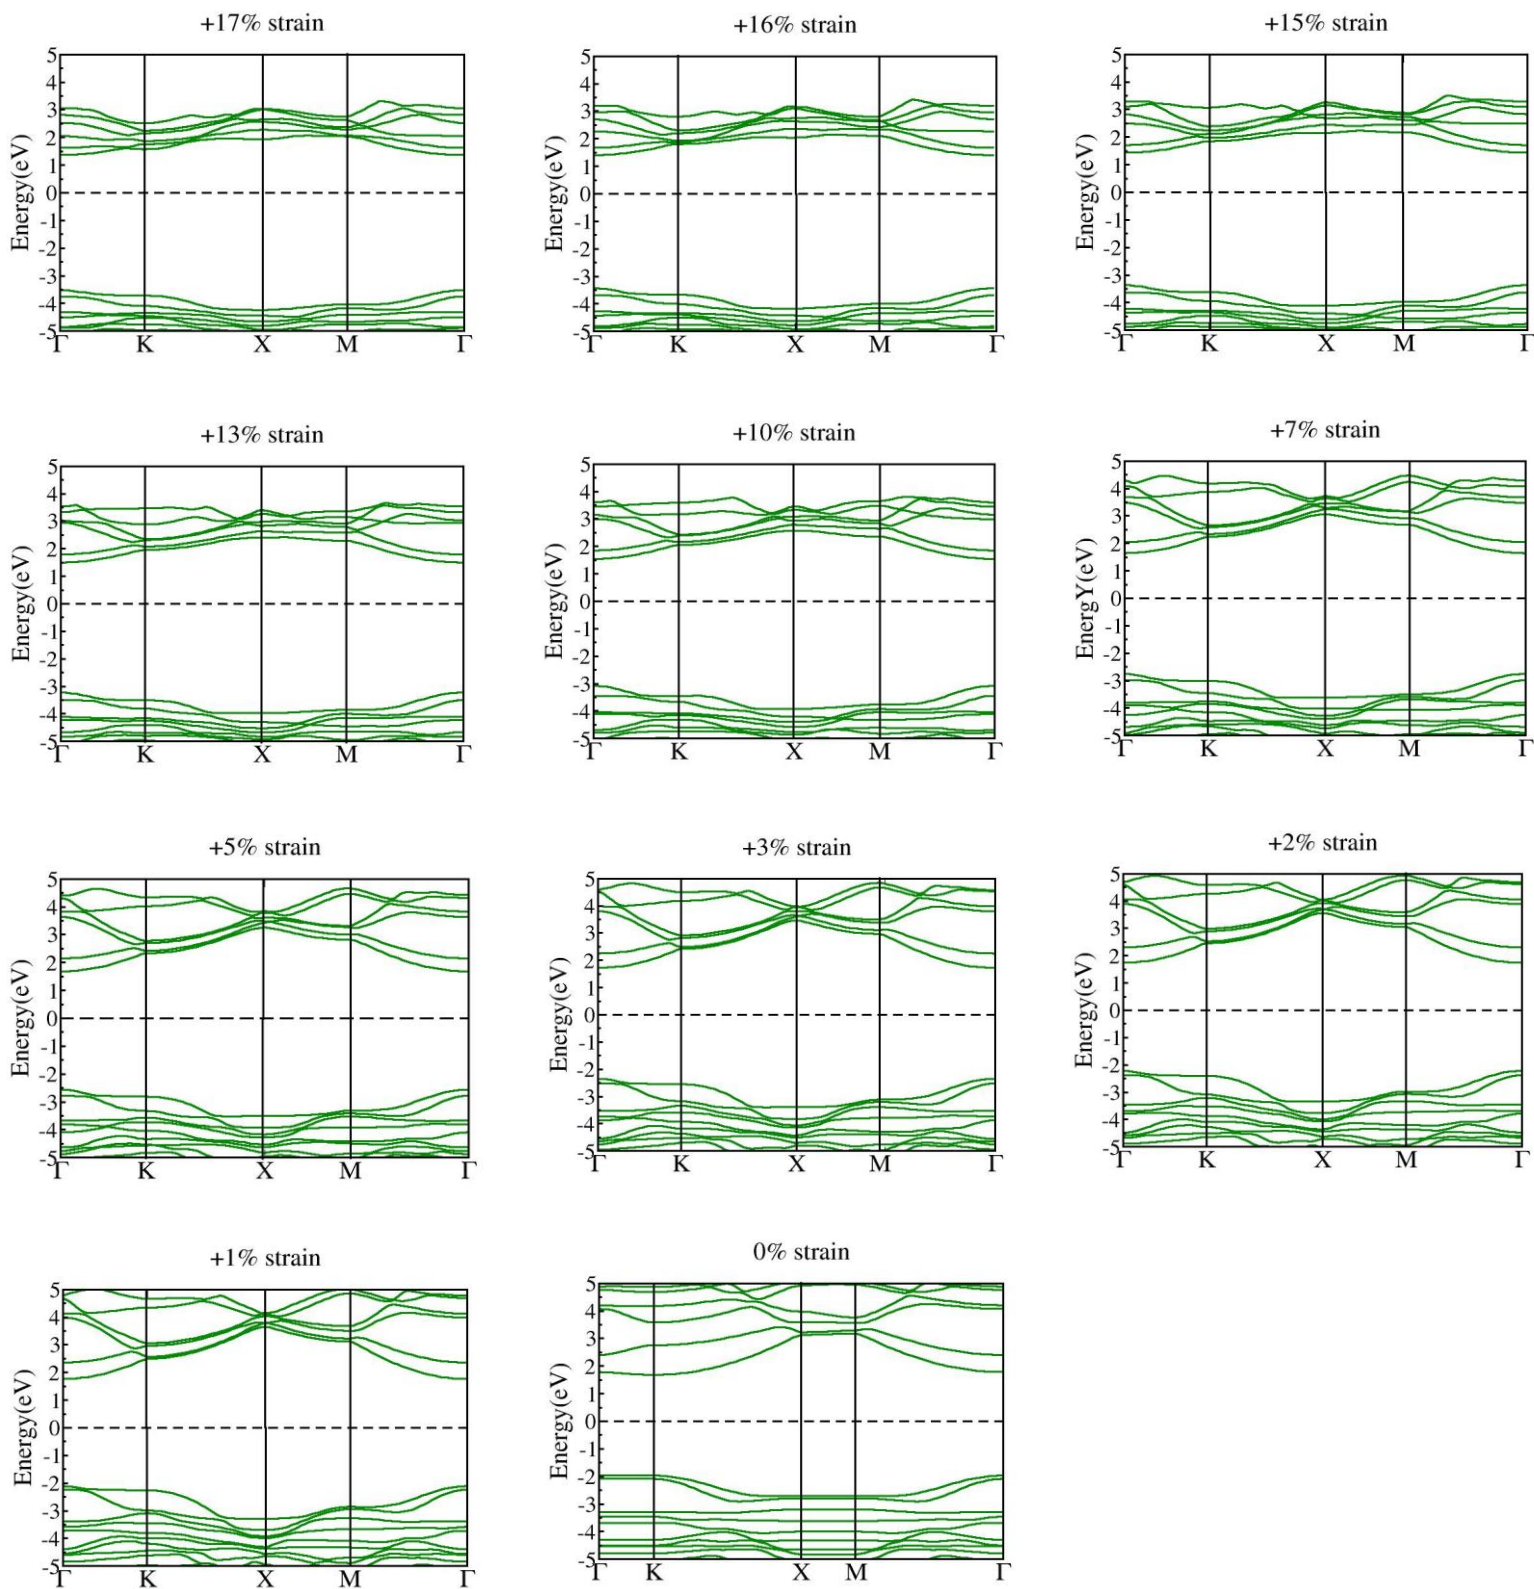

**Figure S13:** Electronic band structure of  $\psi$ -graphane at different values of positive strain.

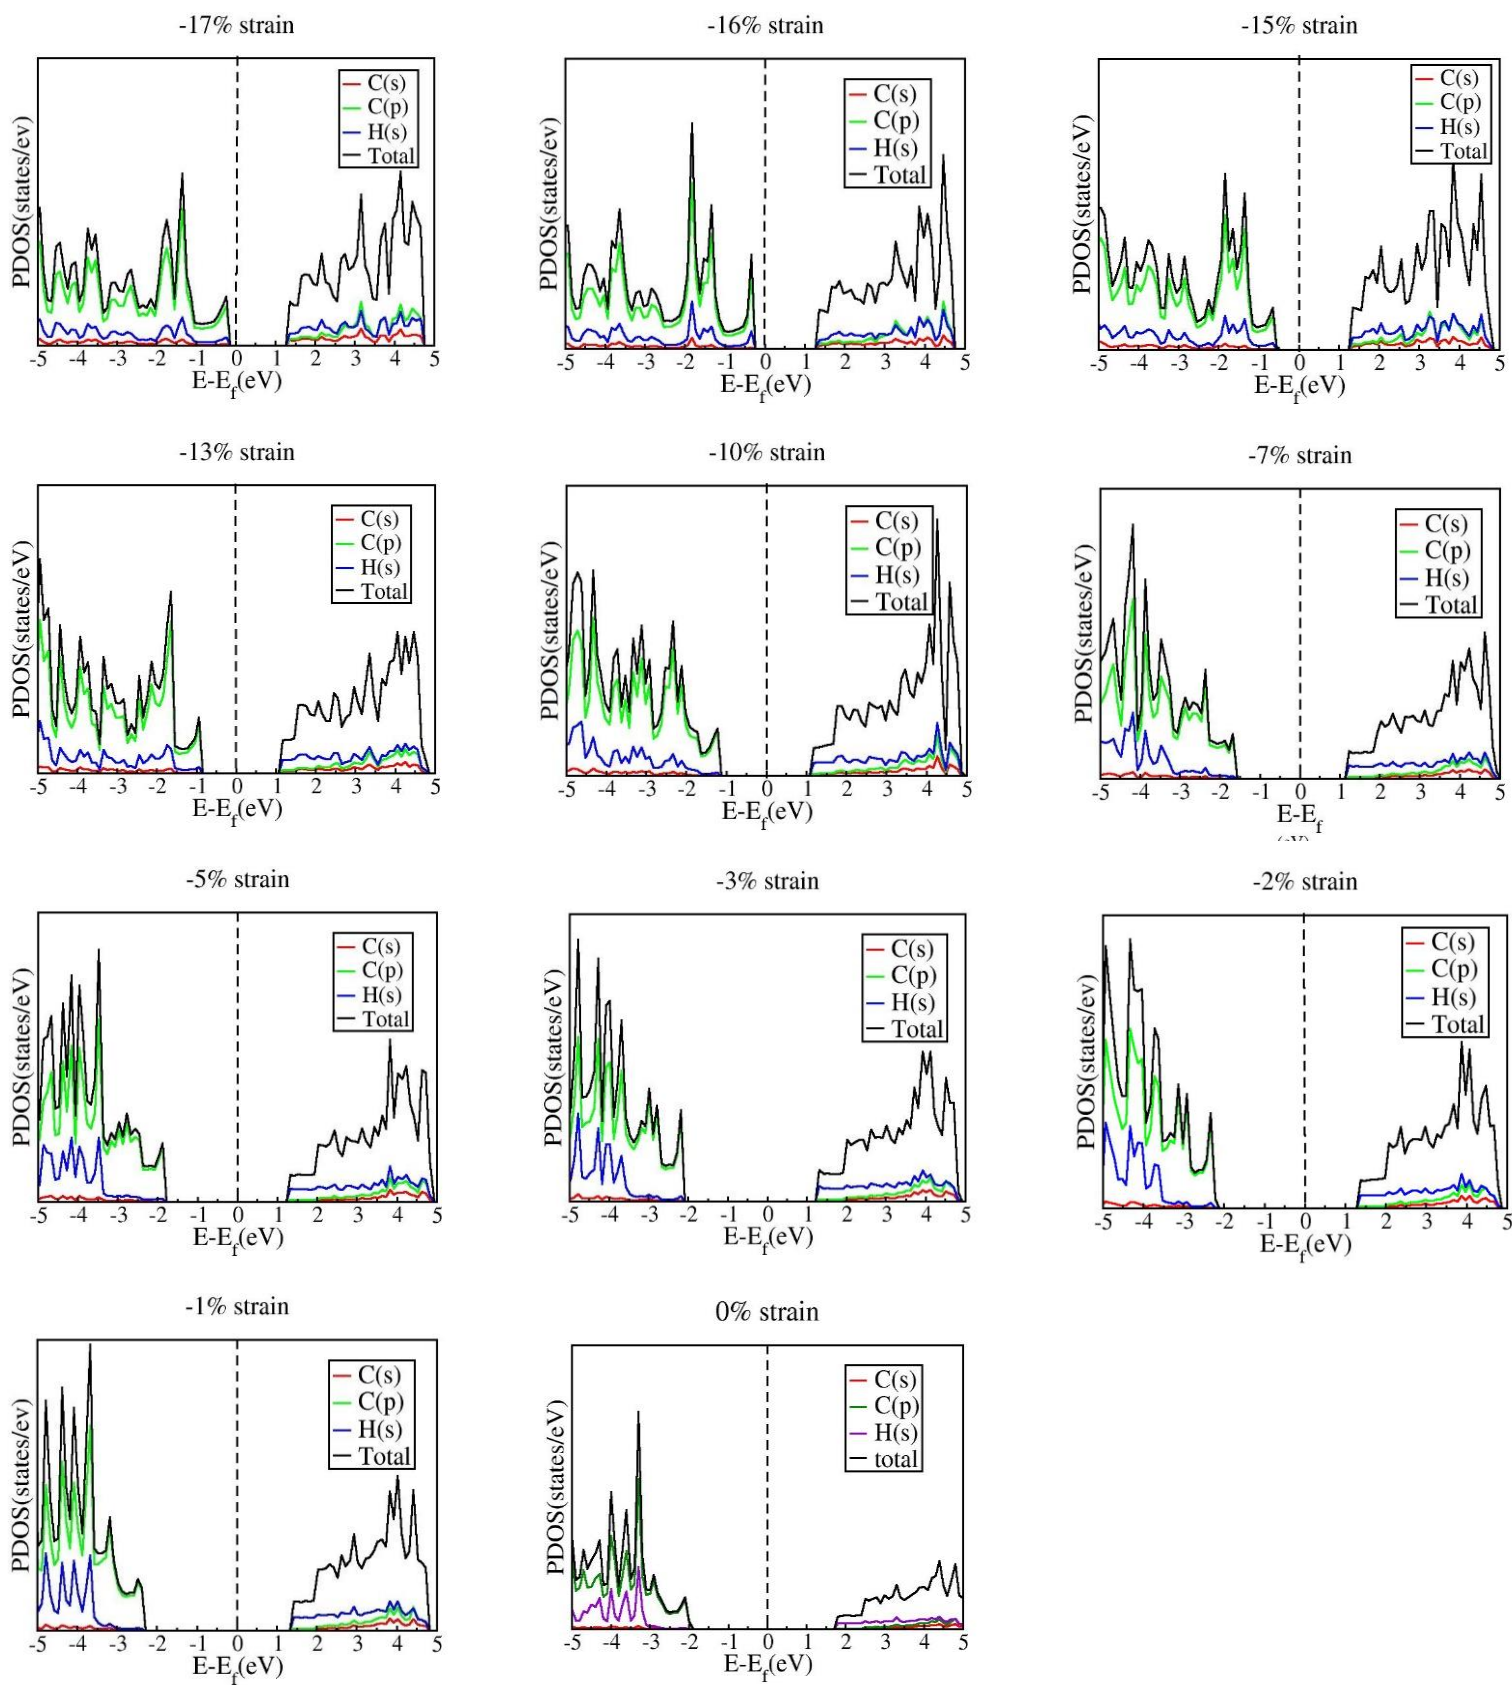

**Figure S14:** PDOS of  $\psi$ -graphane at different values of negative strain.



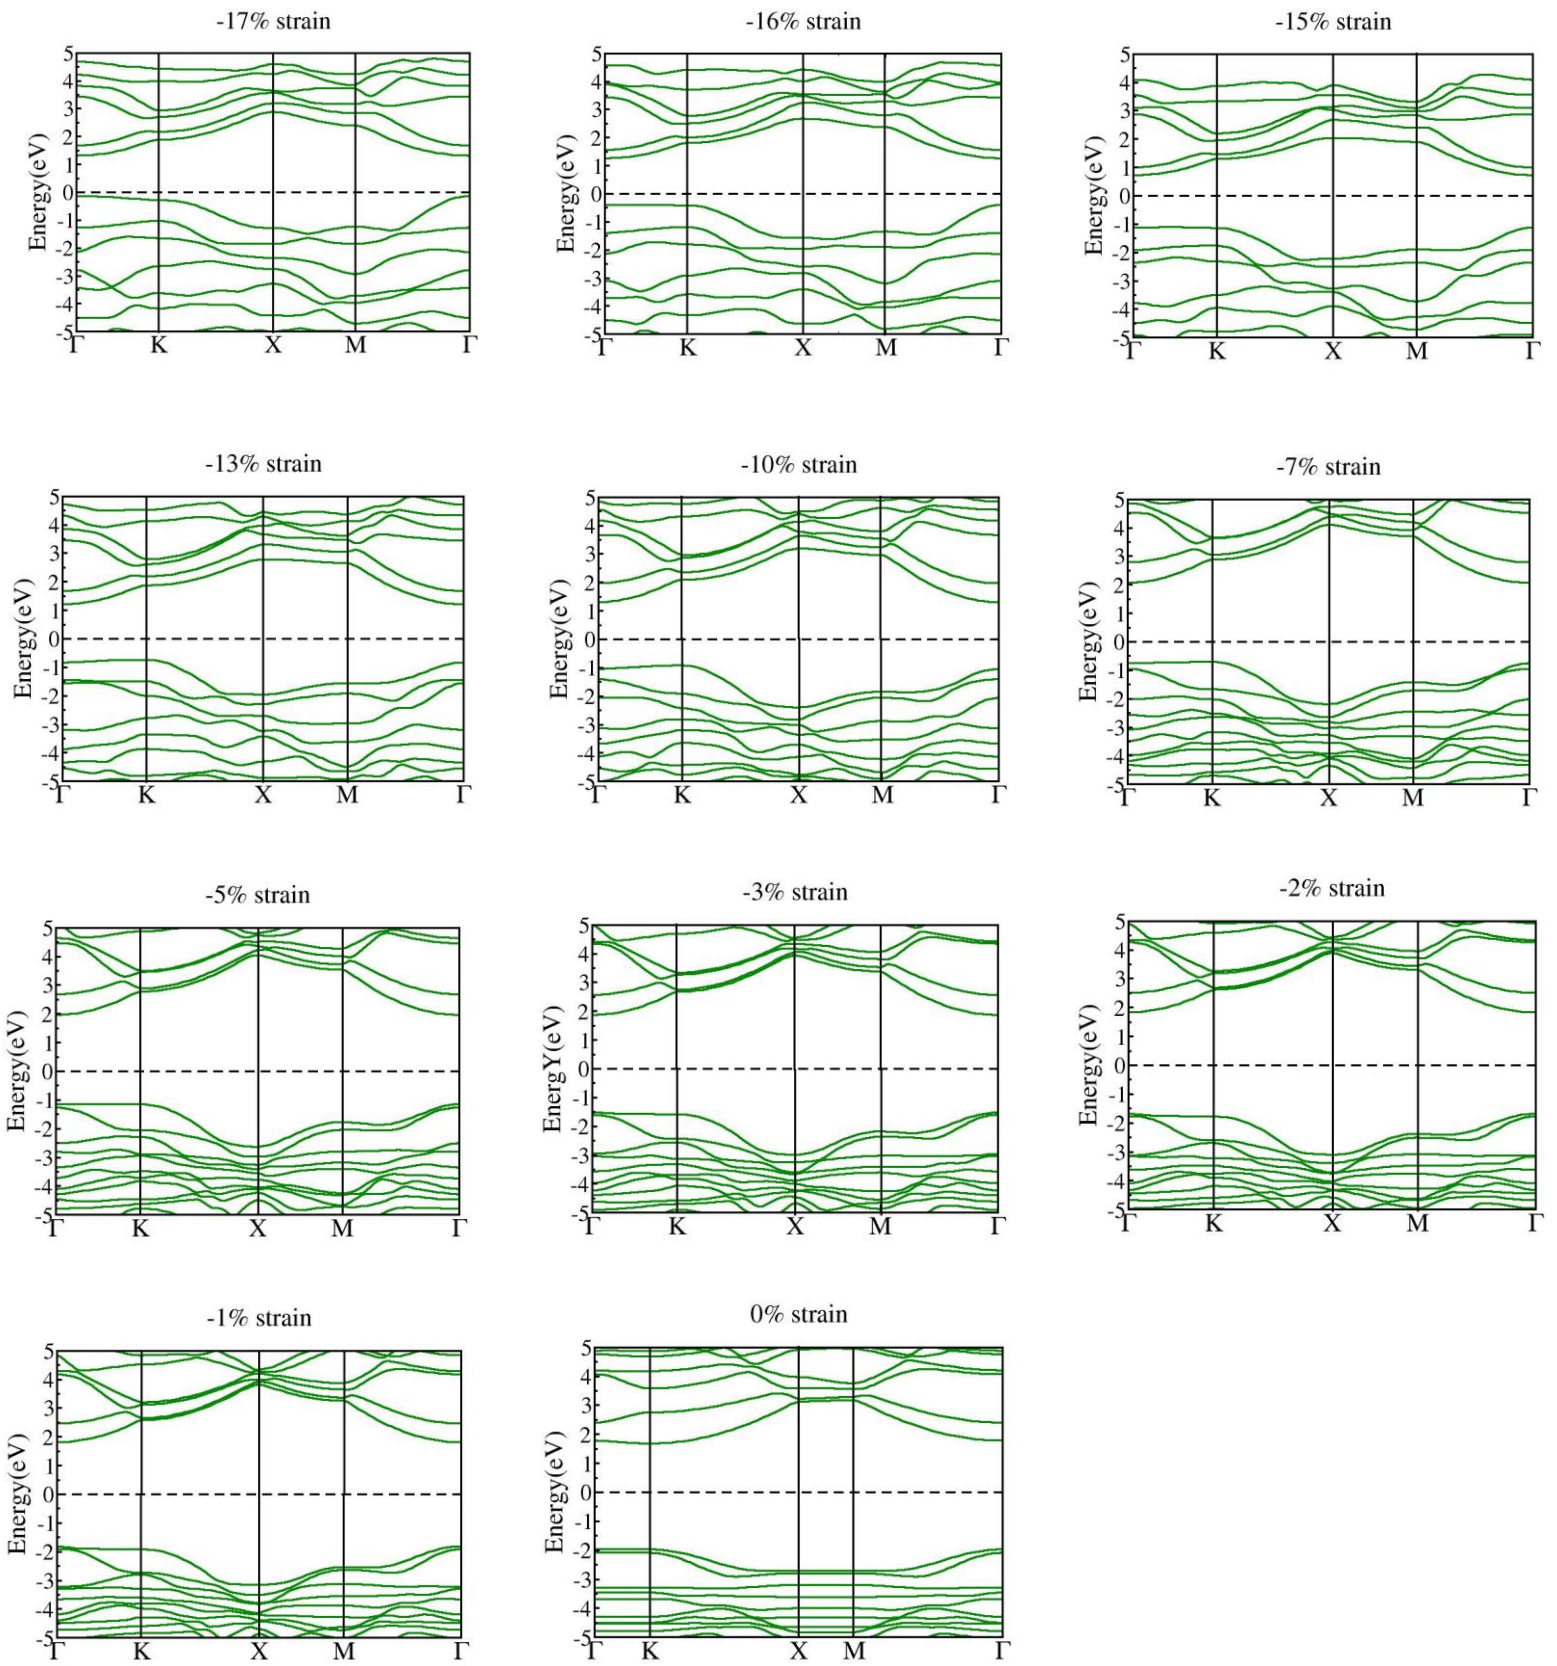

**Figure S15:** Electronic band structure of  $\psi$ -graphane at different values of negative strain.



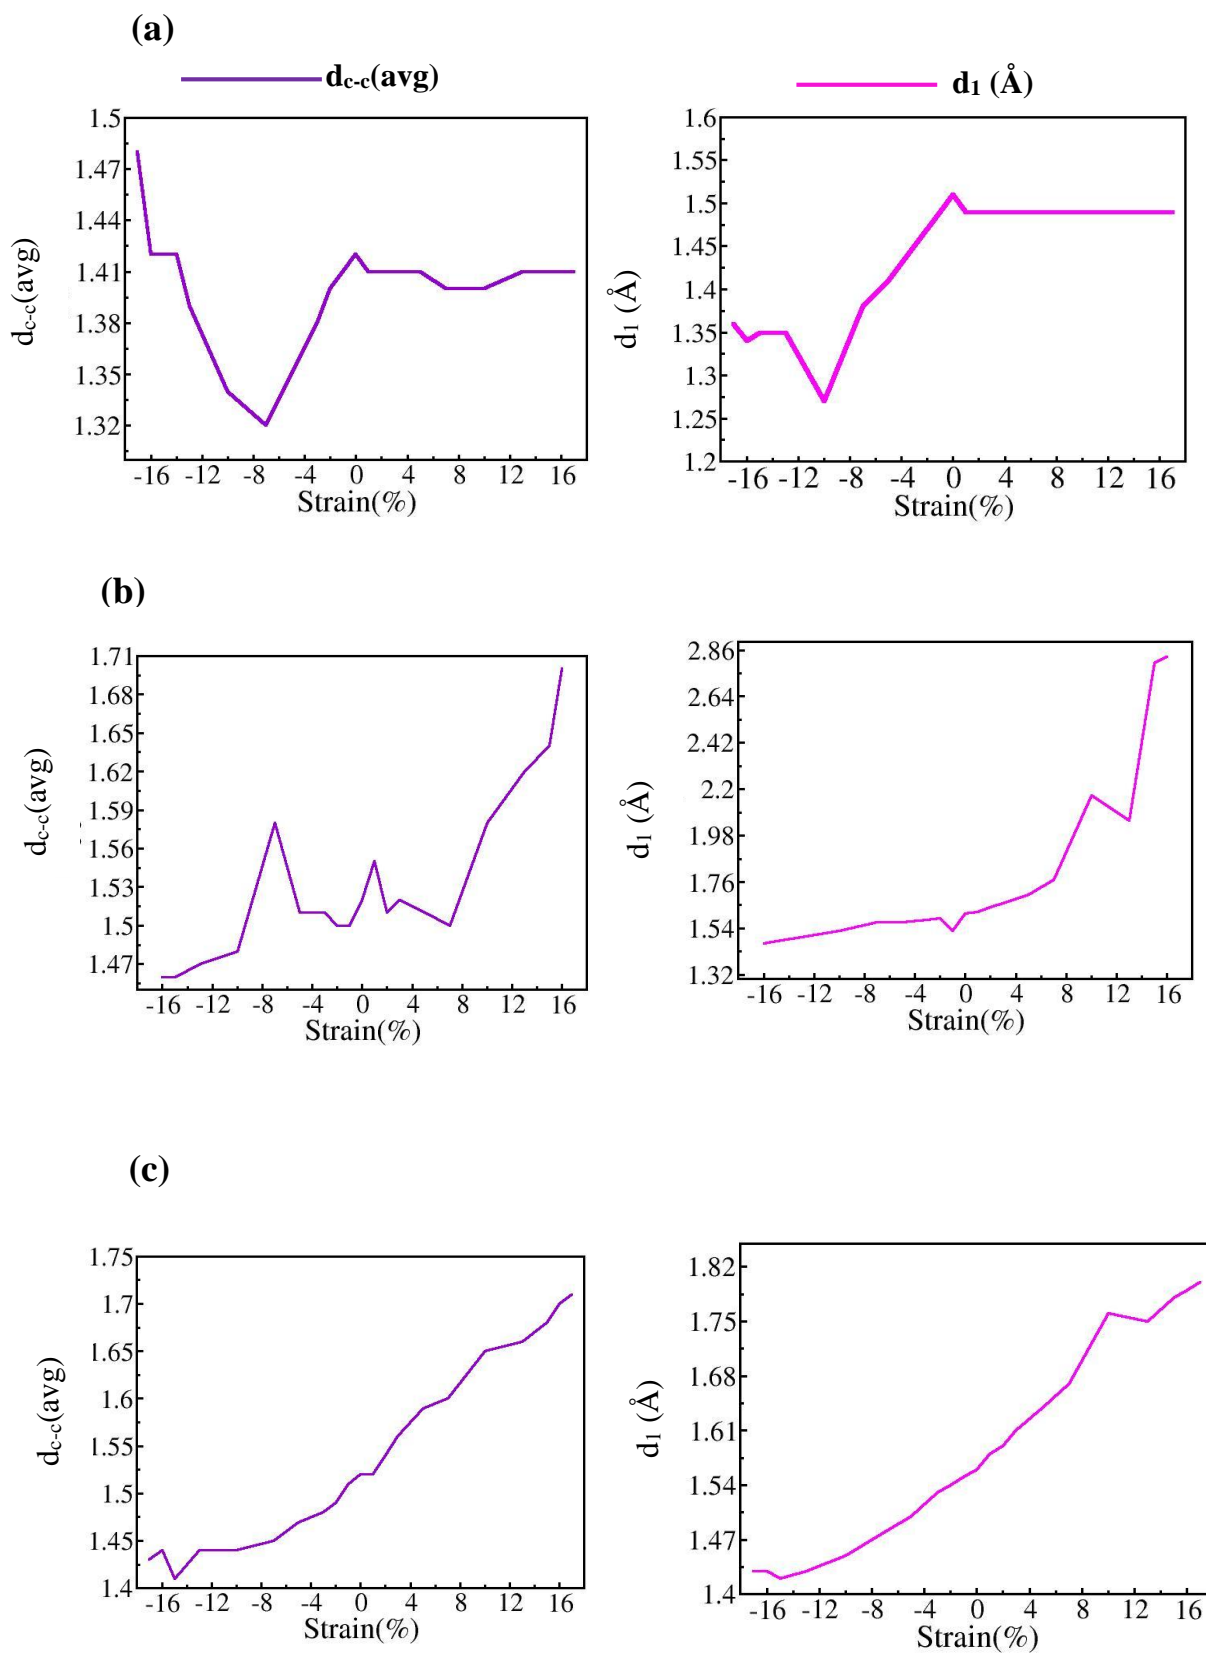

**Figure S16:** Variation of average bond lengths  $d_{c-c}$  (avg) (left) and  $d_1$  (Å) (right) with applied uniform biaxial mechanical strain in (a)  $\psi$ -graphene, (b)  $\psi$ -graphone and (c)  $\psi$ -graphane.
